# Supplementary material
Source: MDPI journal article supplement (https://www.mdpi.com/1424-8247/15/7/857)
Supplement: s1 [file s1]

## **Supplementary Data:**

### **Design and synthesis of new hydantoin acetanilide derivatives as anti-NSCLC targeting EGFR<sup>L858R/T790M</sup> mutations**

Moamen A. Hassanin<sup>1</sup>, Muhamad Mustafa<sup>2\*</sup>, Mohammed A. S. Abourehab<sup>3</sup>, Heba A. Hassan<sup>1</sup>, Omar M. Aly<sup>4\*</sup>, Eman A. M. Beshr<sup>1</sup>

<sup>1</sup> Department of Medicinal Chemistry, Faculty of Pharmacy, Minia University, Minia 61519, Egypt

<sup>2</sup> Department of Medicinal Chemistry, Faculty of Pharmacy, Deraya University, Minia, 6111, Egypt

<sup>3</sup> Department of Pharmaceutics, Faculty of Pharmacy, Umm Al-Qura University, Makkah 21955, Saudi Arabia

<sup>4</sup> Department of Medicinal Chemistry, Faculty of Pharmacy, Port Said University, 42511, Port Said, Egypt

\*Correspondence

Omar M. Aly: Department of Medicinal Chemistry, Faculty of Pharmacy, Port Said University, Port Said,

Egypt, Email: omarsokkar@yahoo.com, omarsokkar@mu.edu.eg Mobile: +201065607771.

Muhamad Mustafa: Department of Medicinal Chemistry, Faculty of Pharmacy, Deraya University, Minia, Egypt,

Email: muhamad\_mustafa99@yahoo.com, muhamad.mustafa@deraya.edu.eg Mobile: +201007620894.

## Table contents

| Figure | Title                                                                                       | Page |
|--------|---------------------------------------------------------------------------------------------|------|
| S1     | 3D representation of erlotinib within EGFR active site                                      | 4    |
| S2     | 3D representation of gefitinib within EGFR active site                                      | 5    |
| S3     | <sup>1</sup> H-NMR spectrum of compound <b>5a</b> in DMSO- <i>d</i> <sub>6</sub> at 400MHz  | 6    |
| S4     | <sup>13</sup> C-NMR spectrum of compound <b>5a</b> in DMSO- <i>d</i> <sub>6</sub> at 100MHz | 6    |
| S5     | ESI mass spectrum of compound <b>5a</b>                                                     | 7    |
| S6     | HPLC analysis for compound <b>5a</b> , retention time (19.947 min)                          | 7    |
| S7     | <sup>1</sup> H-NMR spectrum of compound <b>5b</b> in DMSO- <i>d</i> <sub>6</sub> at 400MHz. | 8    |
| S8     | <sup>13</sup> C-NMR spectrum of compound <b>5b</b> in DMSO- <i>d</i> <sub>6</sub> at 100MHz | 8    |
| S9     | ESI mass spectrum of compound <b>5b</b>                                                     | 9    |
| S10    | <sup>1</sup> H-NMR spectrum of compound <b>5c</b> in DMSO- <i>d</i> <sub>6</sub> at 400MHz  | 9    |
| S11    | <sup>13</sup> C-NMR spectrum of compound <b>5c</b> in DMSO- <i>d</i> <sub>6</sub> at 100MHz | 10   |
| S12    | ESI mass spectrum of compound <b>5c</b>                                                     | 10   |
| S13    | <sup>1</sup> H-NMR spectrum of compound <b>5d</b> in DMSO- <i>d</i> <sub>6</sub> at 400MHz  | 11   |
| S14    | <sup>13</sup> C-NMR spectrum of compound <b>5d</b> in DMSO- <i>d</i> <sub>6</sub> at 100MHz | 11   |
| S15    | ESI mass spectrum of compound <b>5d</b>                                                     | 12   |
| S16    | <sup>1</sup> H-NMR spectrum of compound <b>5e</b> in DMSO- <i>d</i> <sub>6</sub> at 400MHz  | 12   |
| S17    | <sup>13</sup> C-NMR spectrum of compound <b>5e</b> in DMSO- <i>d</i> <sub>6</sub> at 100MHz | 13   |
| S18    | ESI mass spectrum of compound <b>5e</b>                                                     | 13   |
| S19    | <sup>1</sup> H-NMR spectrum of compound <b>5f</b> in DMSO- <i>d</i> <sub>6</sub> at 400MHz  | 14   |
| S20    | <sup>13</sup> C-NMR spectrum of compound <b>5f</b> in DMSO- <i>d</i> <sub>6</sub> at 100MHz | 15   |
| S21    | ESI mass spectrum of compound <b>5f</b>                                                     | 15   |
| S22    | <sup>1</sup> H-NMR spectrum of compound <b>5g</b> in DMSO- <i>d</i> <sub>6</sub> at 400MHz  | 16   |

|     |                                                                                  |    |
|-----|----------------------------------------------------------------------------------|----|
| S23 | <sup>13</sup> C-NMR spectrum of compound <b>5g</b> in DMSO- <i>d</i> 6 at 100MHz | 16 |
| S24 | ESI mass spectrum of compound <b>5g</b>                                          | 17 |
| S25 | <sup>1</sup> H-NMR spectrum of compound <b>5h</b> in DMSO- <i>d</i> 6 at 400MHz  | 17 |
| S26 | <sup>13</sup> C-NMR spectrum of compound <b>5h</b> in DMSO- <i>d</i> 6 at 100MHz | 18 |
| S27 | ESI mass spectrum of compound <b>5h</b>                                          | 18 |
| S28 | <sup>1</sup> H-NMR spectrum of compound <b>5i</b> in DMSO- <i>d</i> 6 at 400MHz  | 19 |
| S29 | <sup>13</sup> C-NMR spectrum of compound <b>5i</b> in DMSO- <i>d</i> 6 at 100MHz | 19 |
| S30 | ESI mass spectrum of compound <b>5i</b>                                          | 20 |
| S31 | <sup>1</sup> H-NMR spectrum of compound <b>5j</b> in DMSO- <i>d</i> 6 at 400MHz  | 20 |
| S32 | <sup>13</sup> C-NMR spectrum of compound <b>5j</b> in DMSO- <i>d</i> 6 at 100MHz | 21 |
| S33 | ESI mass spectrum of compound <b>5j</b>                                          | 21 |
| S34 | <sup>1</sup> H-NMR spectrum of compound <b>5k</b> in DMSO- <i>d</i> 6 at 400MHz  | 22 |
| S35 | <sup>13</sup> C-NMR spectrum of compound <b>5k</b> in DMSO- <i>d</i> 6 at 100MHz | 22 |
| S36 | ESI mass spectrum of compound <b>5k</b>                                          | 23 |
| S37 | <sup>1</sup> H-NMR spectrum of compound <b>5l</b> in DMSO- <i>d</i> 6 at 400MHz  | 23 |
| S38 | <sup>13</sup> C-NMR spectrum of compound <b>5l</b> in DMSO- <i>d</i> 6 at 100MHz | 24 |
| S39 | ESI mass spectrum of compound <b>5l</b>                                          | 24 |
| S40 | <sup>1</sup> H-NMR spectrum of compound <b>5m</b> in DMSO- <i>d</i> 6 at 400MHz  | 25 |
| S41 | <sup>13</sup> C-NMR spectrum of compound <b>5m</b> in DMSO- <i>d</i> 6 at 100MHz | 25 |
| S42 | ESI mass spectrum of compound <b>5m</b>                                          | 26 |
| S43 | <sup>1</sup> H-NMR spectrum of compound <b>5n</b> in DMSO- <i>d</i> 6 at 400MHz  | 26 |
| S44 | <sup>13</sup> C-NMR spectrum of compound <b>5n</b> in DMSO- <i>d</i> 6 at 100MHz | 27 |
| S45 | ESI mass spectrum of compound <b>5n</b>                                          | 27 |
| S46 | Western blotting analysis measuring the expression of <b>5a</b> on EGFR          |    |

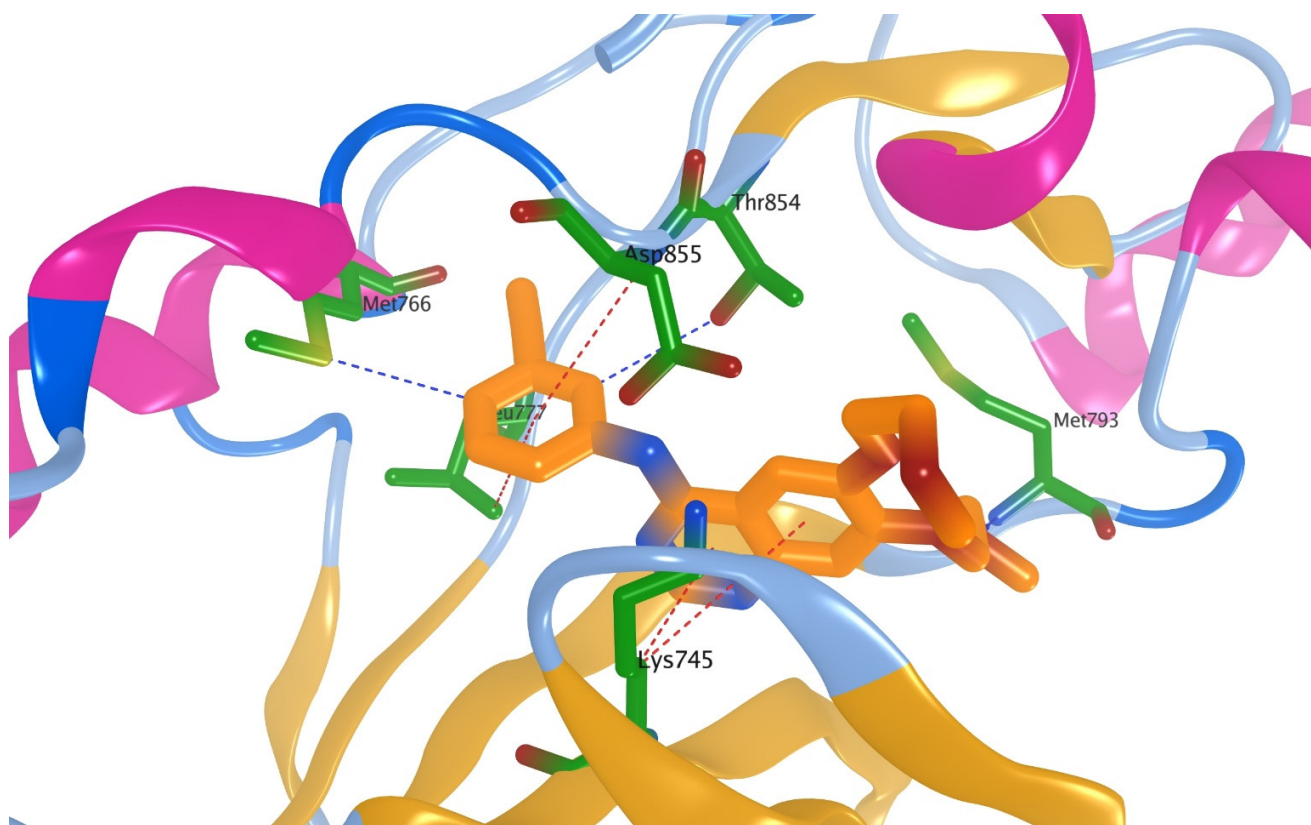

**Figure S1.** 3D representation of erlotinib within EGFR active site

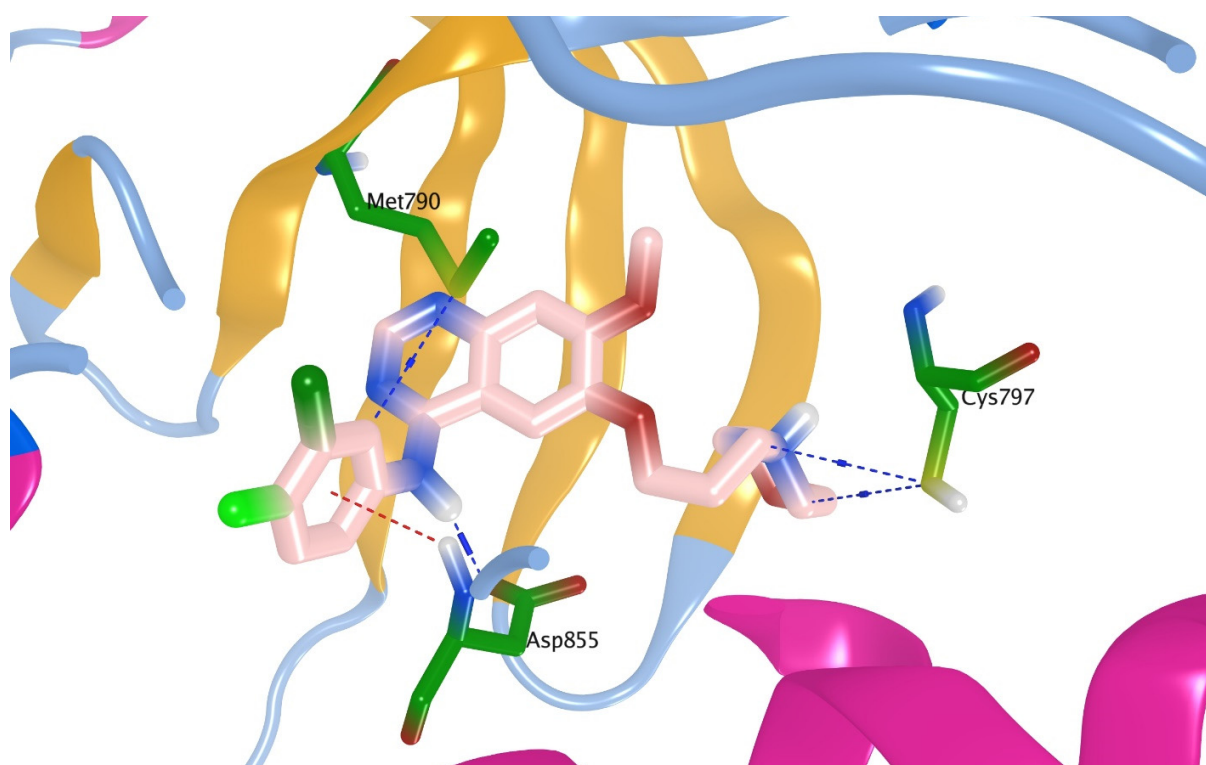

**Figure S2.** 3D representation of gefitinib within EGFR active site

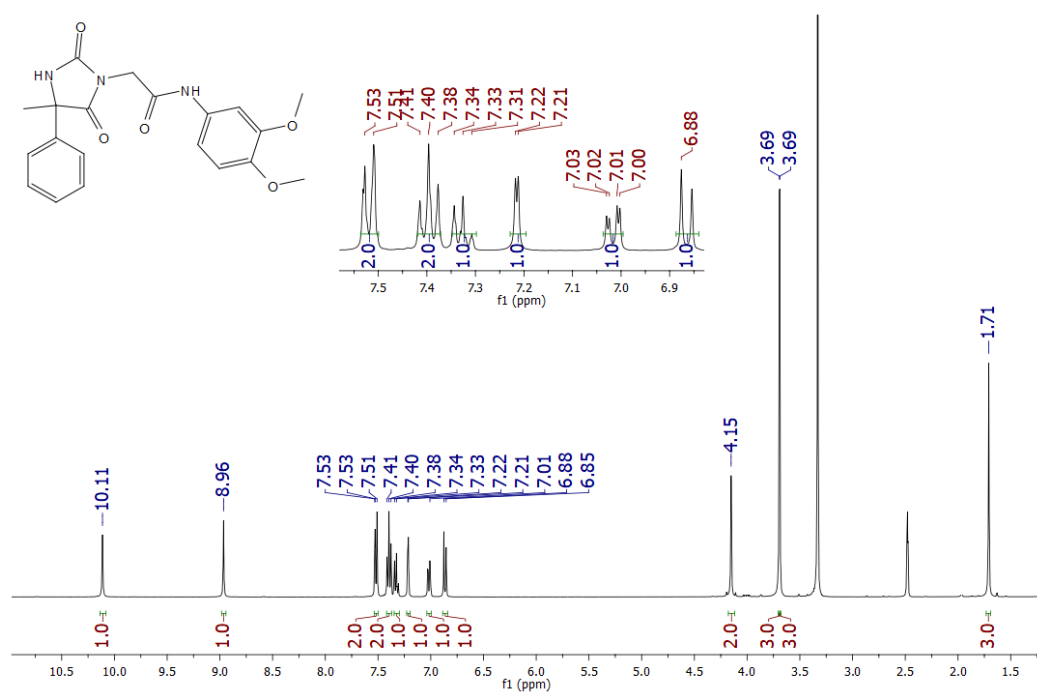

**Figure S3.** <sup>1</sup>H-NMR spectrum of compound **5a** in DMSO-*d*<sub>6</sub> at 400MHz.

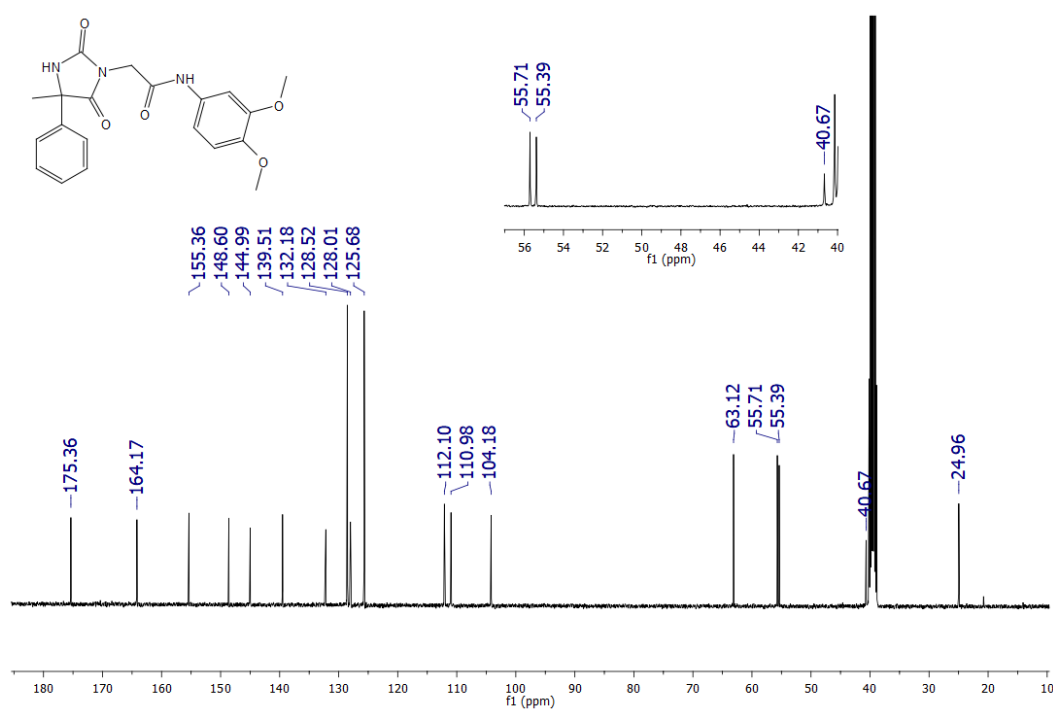

**Figure S4.** <sup>13</sup>C-NMR spectrum of compound **5a** in DMSO-*d*<sub>6</sub> at 100MHz.

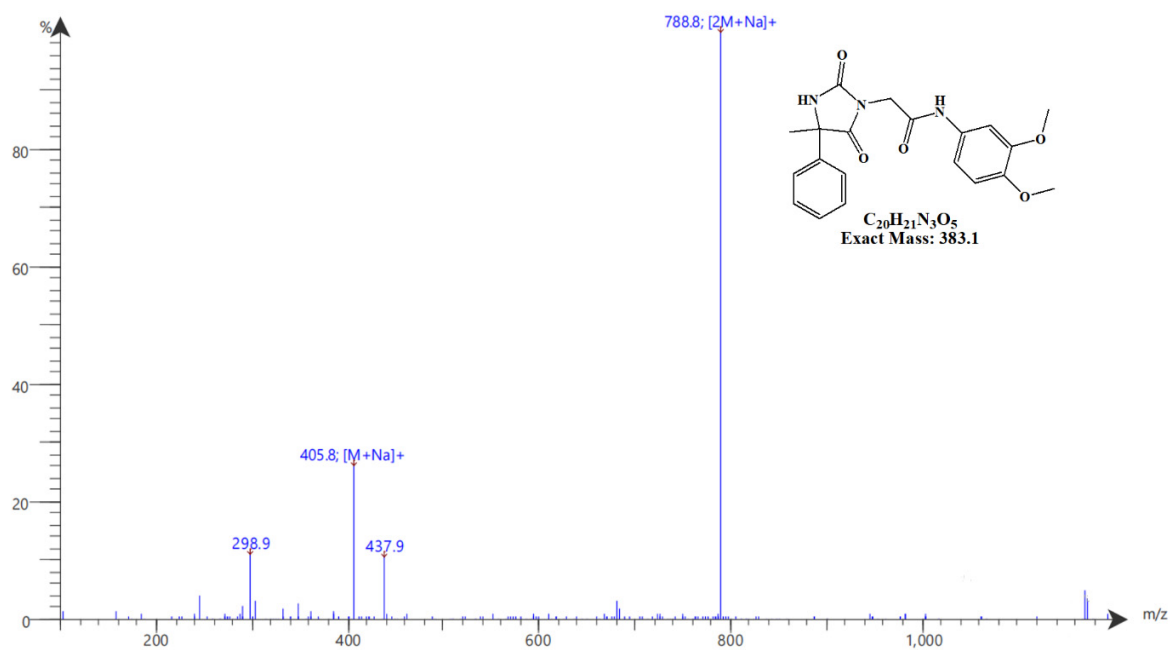

**Figure S5.** ESI mass spectrum of compound **5a**.

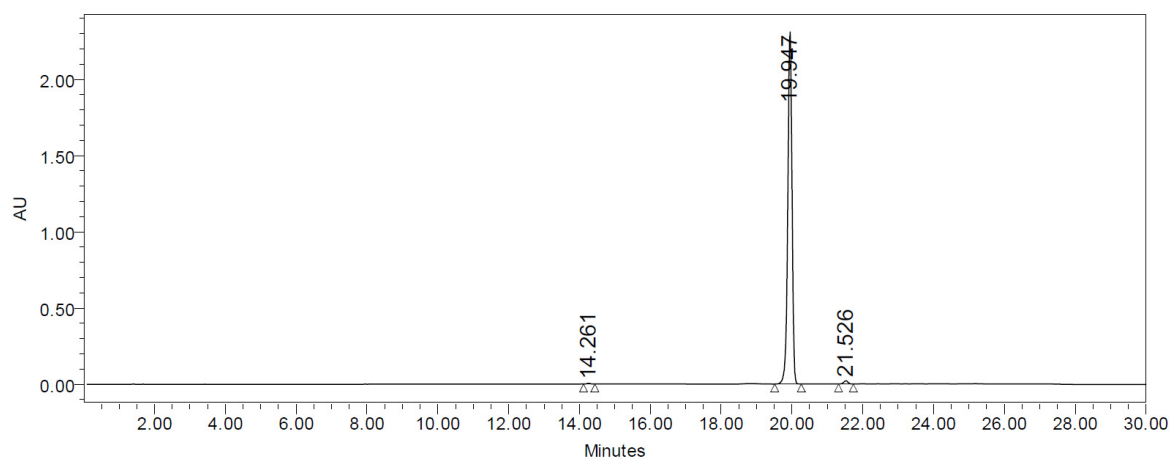

**Figure S6.** HPLC analysis for compound **5a**, retention time (19.947 min)

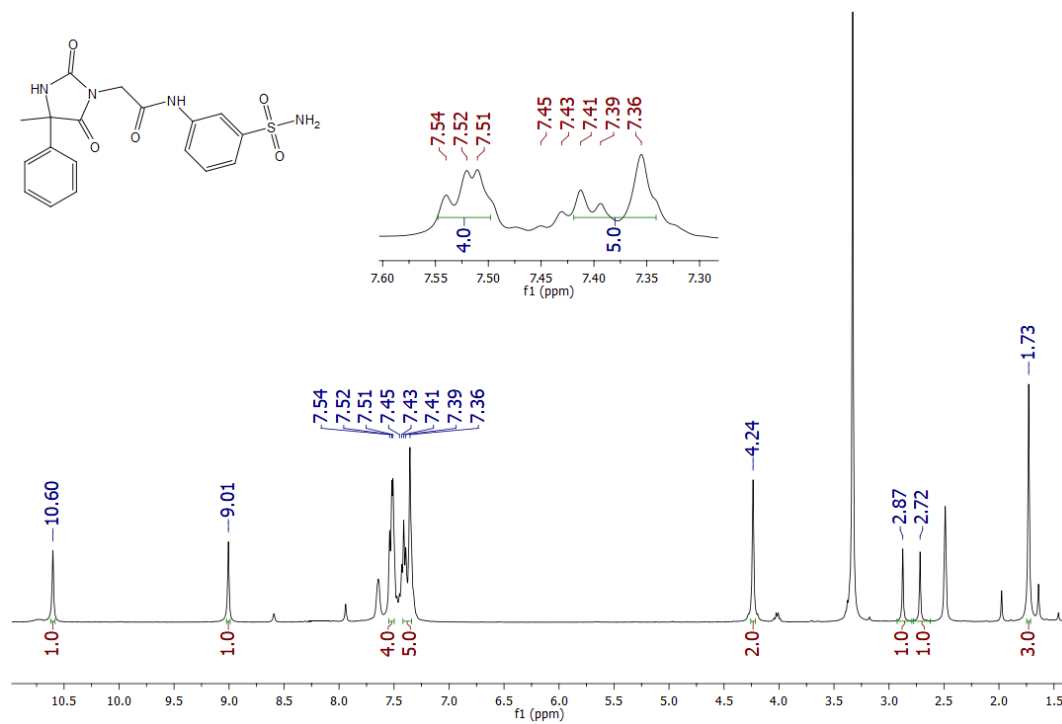

**Figure S7.** <sup>1</sup>H-NMR spectrum of compound **5b** in DMSO-*d*<sub>6</sub> at 400MHz.

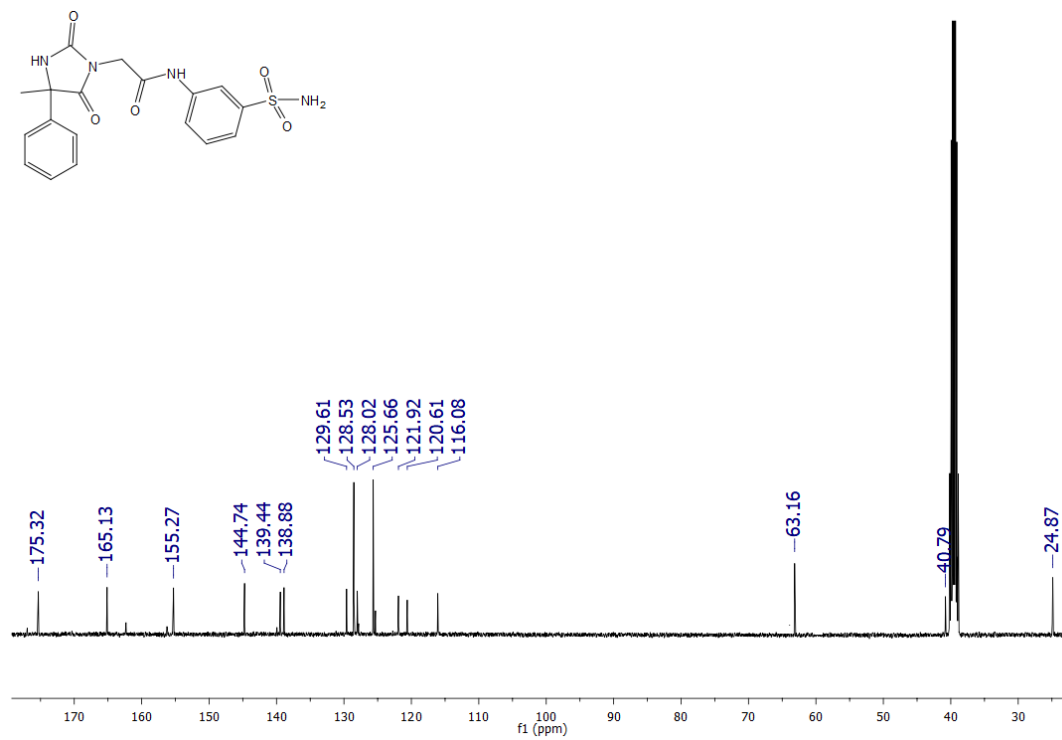

**Figure S8.** <sup>13</sup>C-NMR spectrum of compound **5b** in DMSO-*d*<sub>6</sub> at 100MHz.



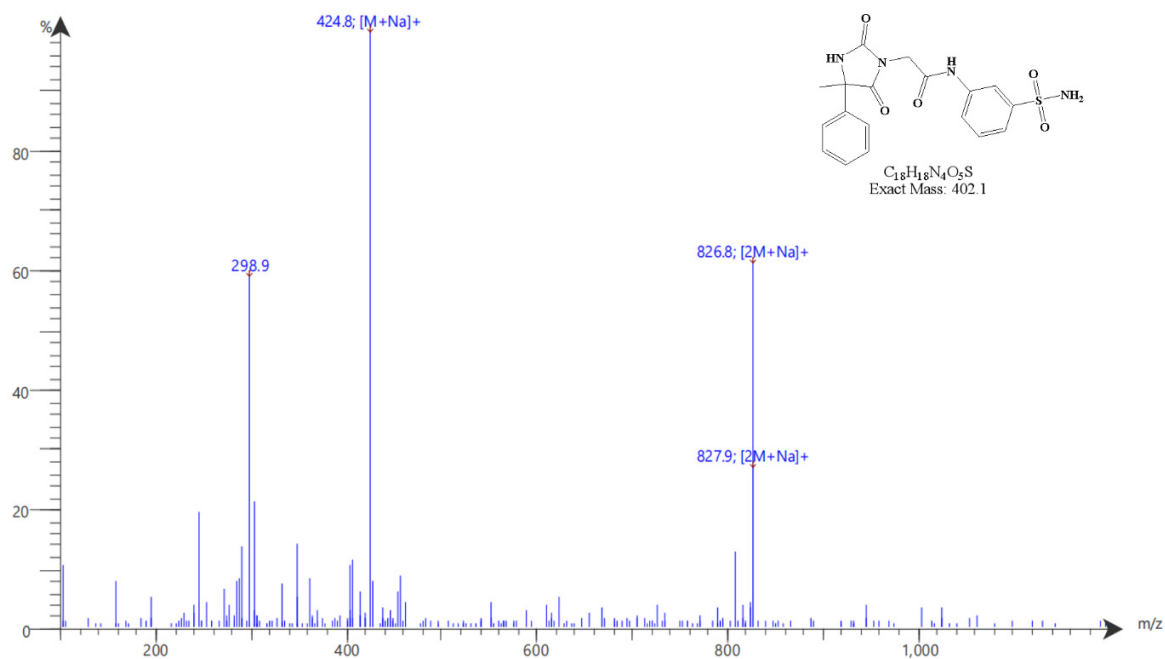

**Figure S9.** ESI mass spectrum of compound **5b**.

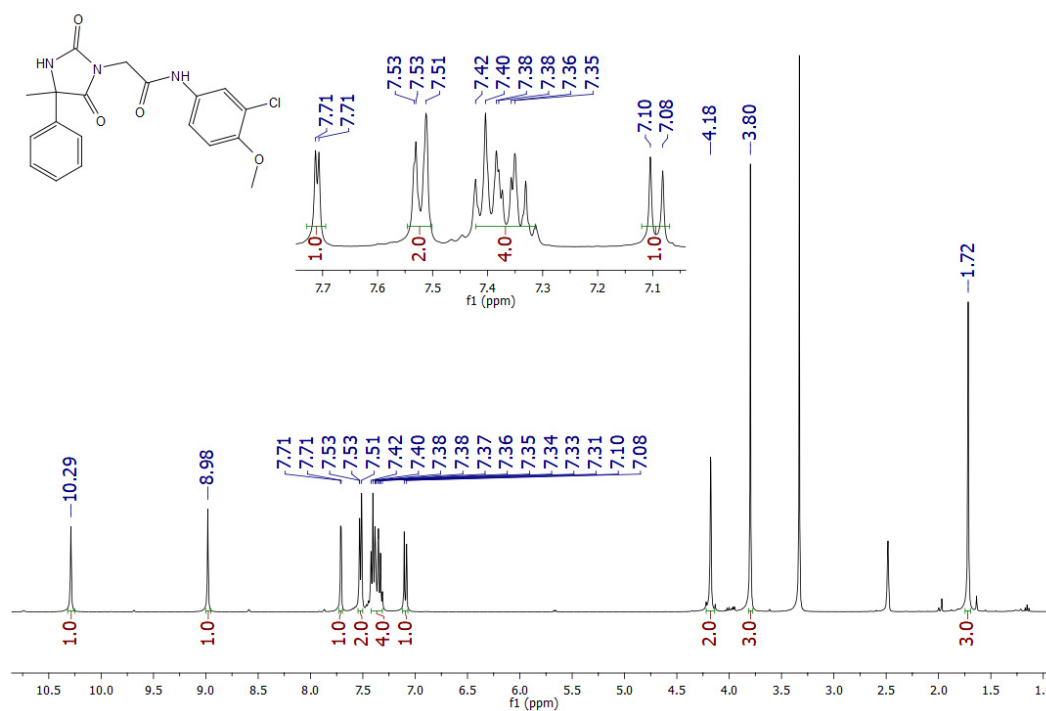

**Figure S10.**  $^1H$ -NMR spectrum of compound **5c** in  $DMSO-d_6$  at 400MHz.

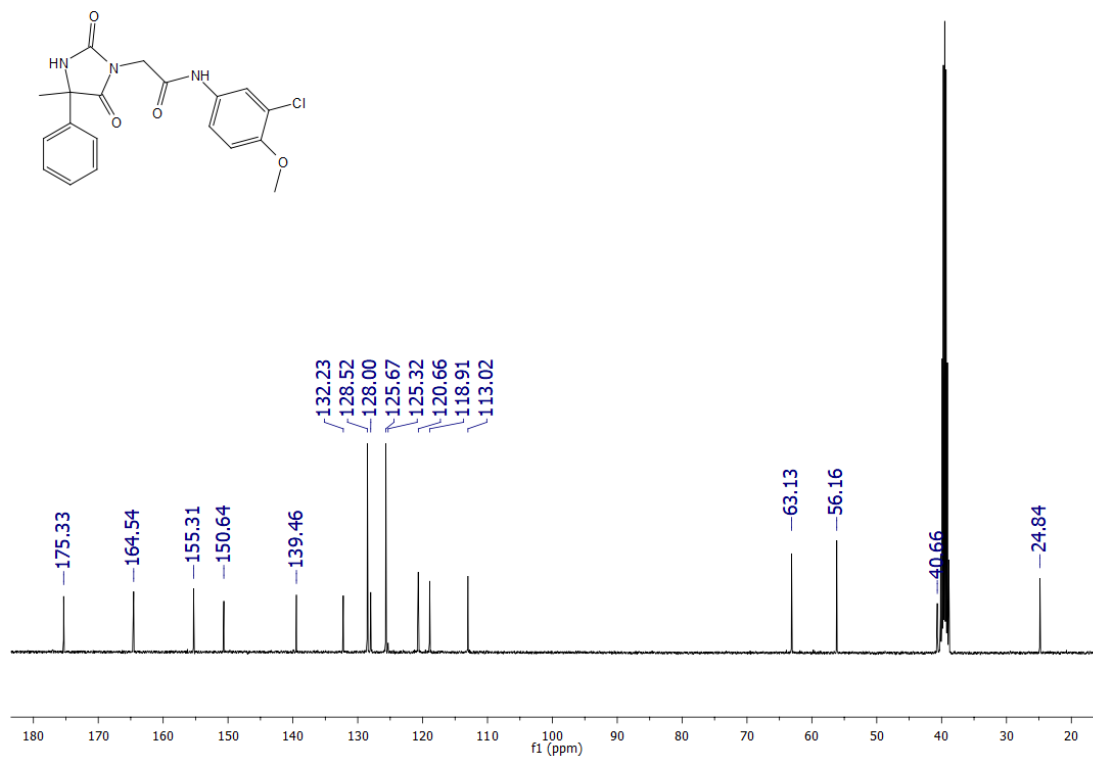

**Figure S11.** <sup>13</sup>C-NMR spectrum of compound **5c** in DMSO-*d*<sub>6</sub> at 100MHz.

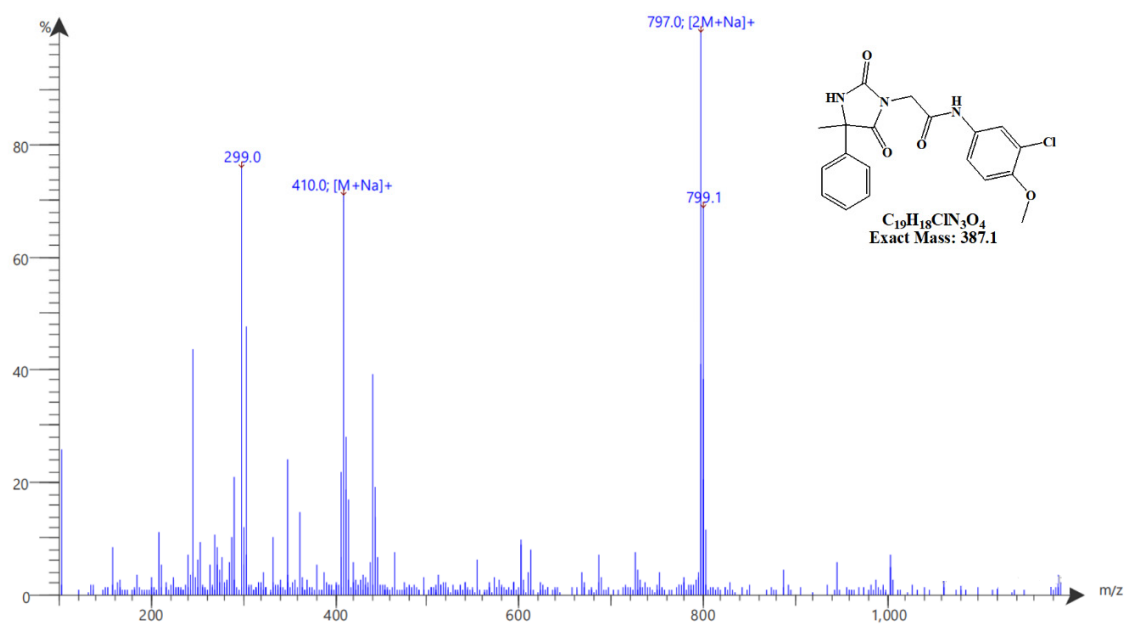

**Figure S12.** ESI mass spectrum of compound **5c**.

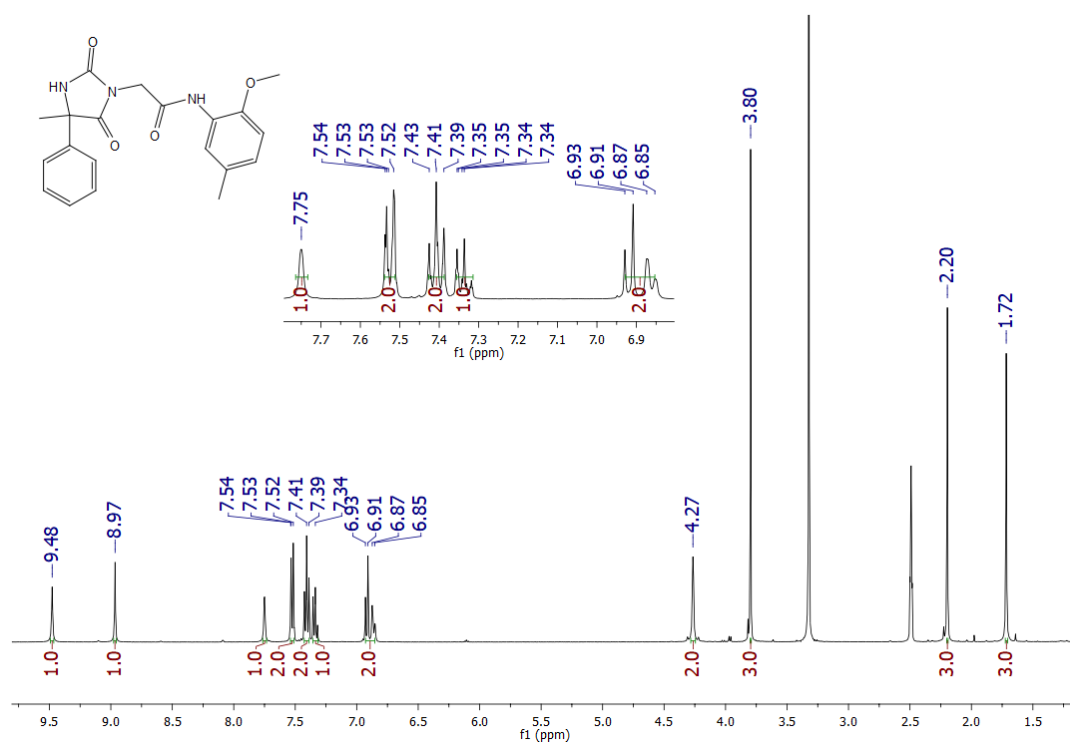

**Figure S13.** <sup>1</sup>H-NMR spectrum of compound **5d** in DMSO-*d*<sub>6</sub> at 400MHz.

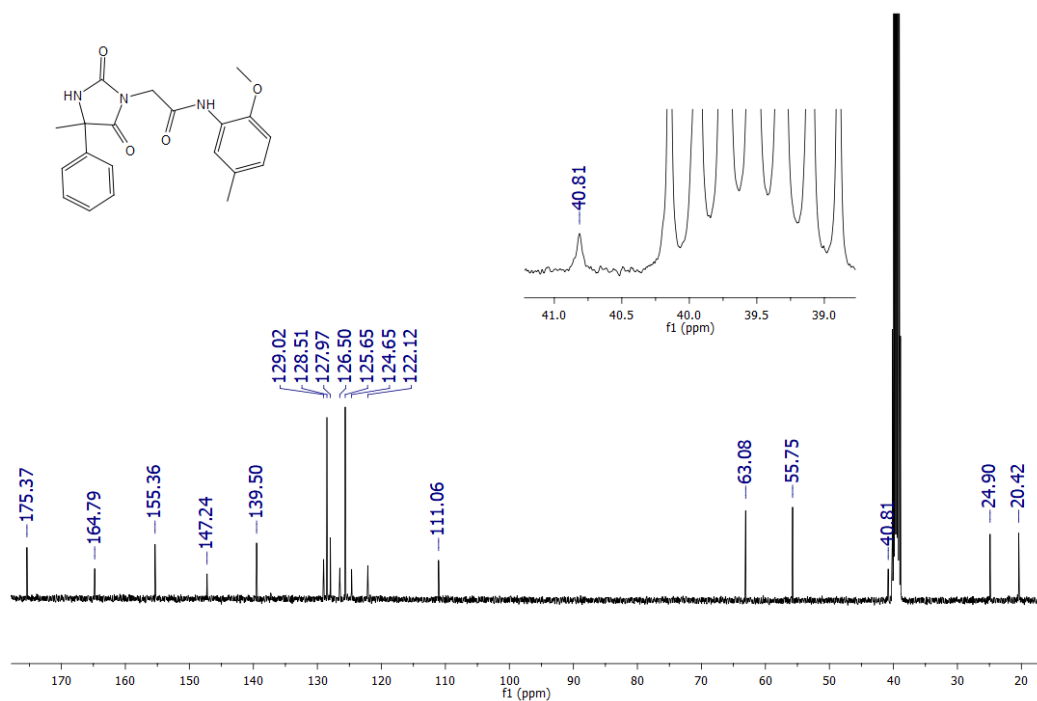

**Figure S14.** <sup>13</sup>C-NMR spectrum of compound **5d** in DMSO-*d*<sub>6</sub> at 100MHz.

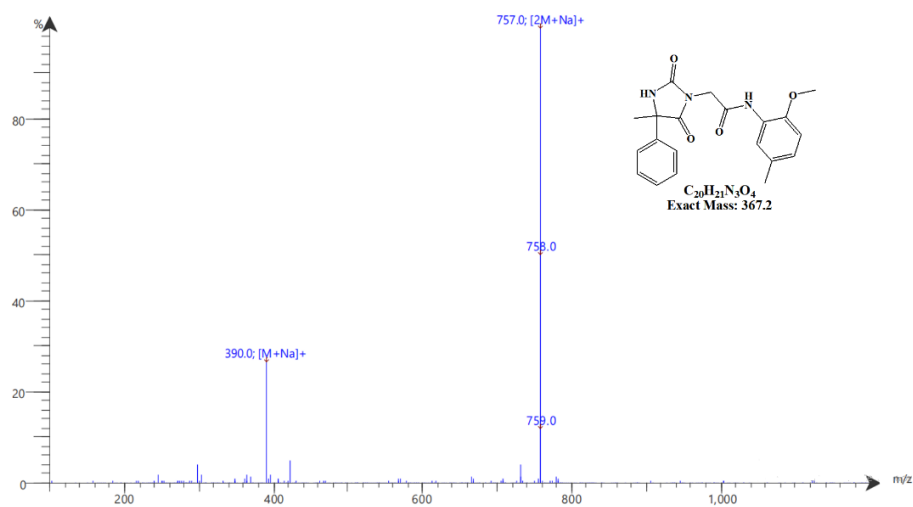

**Figure S15.** ESI mass spectrum of compound **5d**.

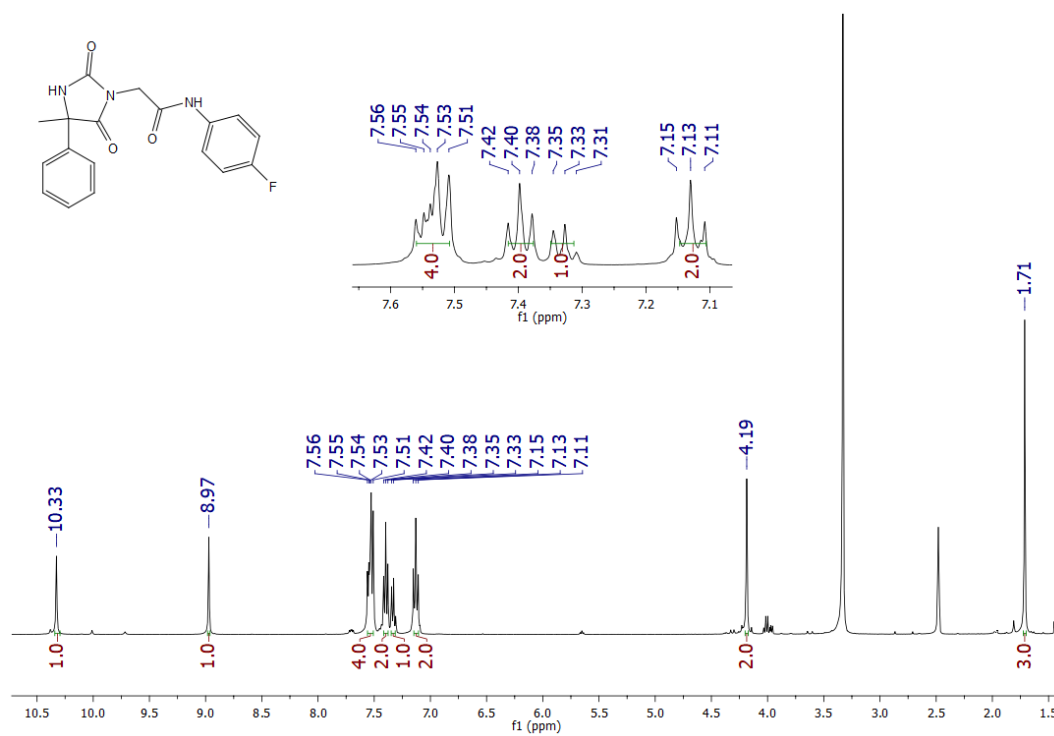

**Figure S16.**  $^1H$ -NMR spectrum of compound **5e** in  $DMSO-d_6$  at 400MHz.

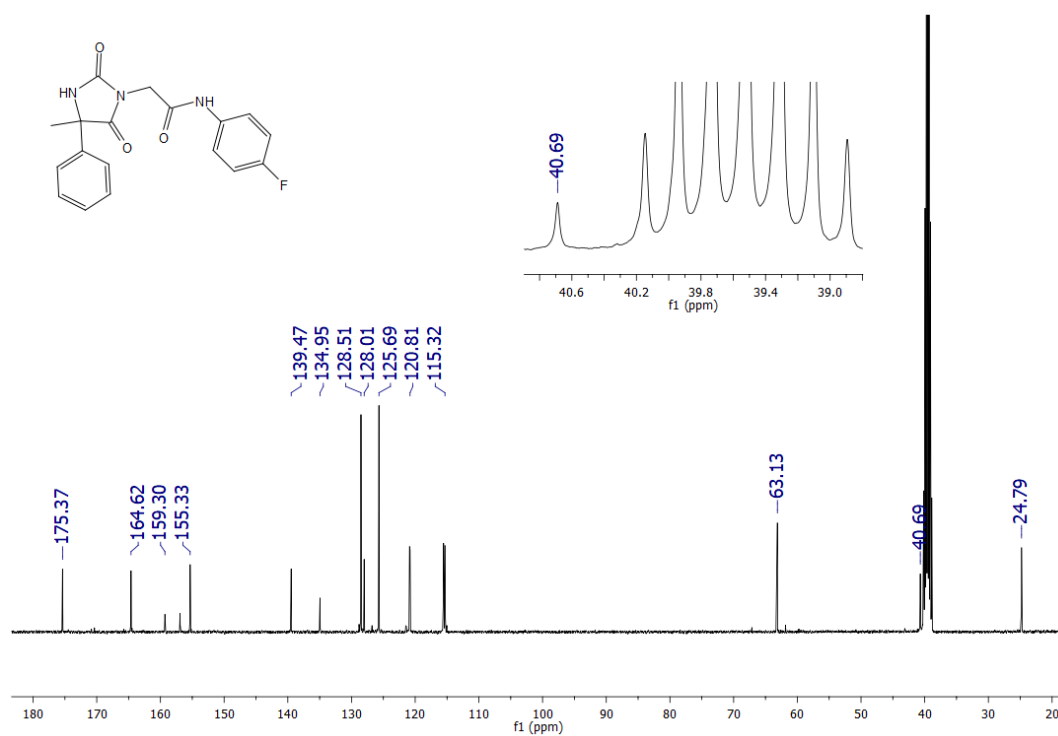

**Figure S17.** <sup>13</sup>C-NMR spectrum of compound **5e** in DMSO-*d*<sub>6</sub> at 100MHz.

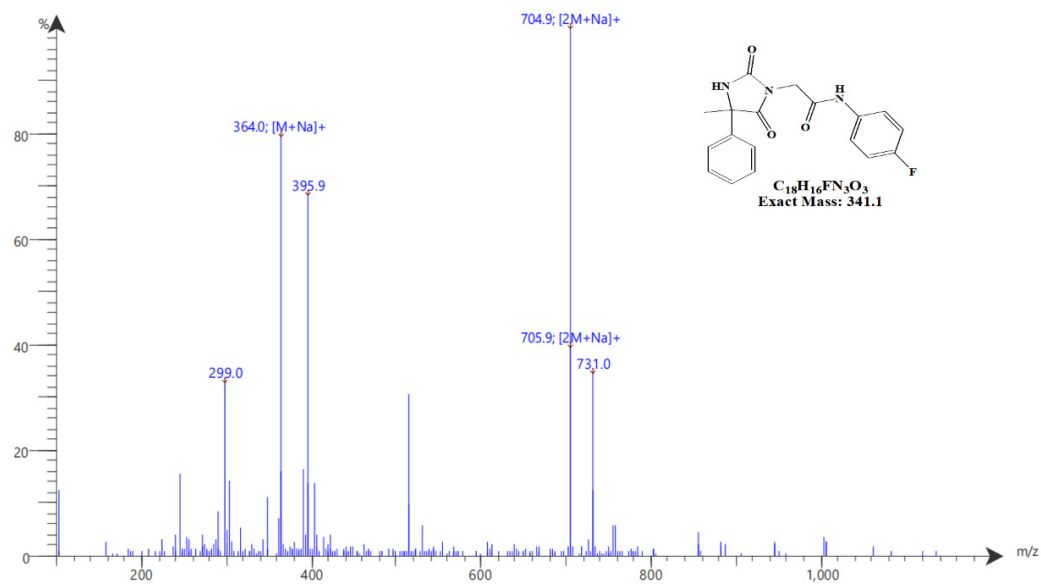

**Figure S18.** ESI mass spectrum of compound **5e**.

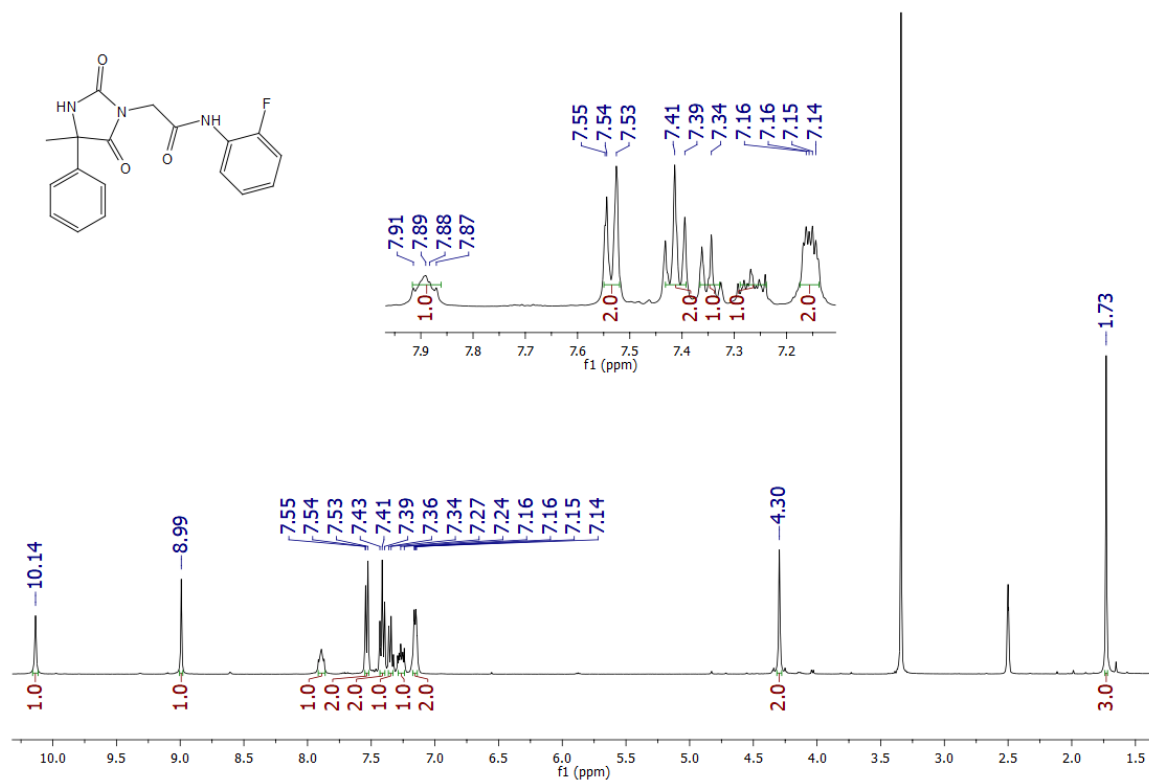

**Figure S19.** <sup>1</sup>H-NMR spectrum of compound **5f** in DMSO-*d*<sub>6</sub> at 400MHz.

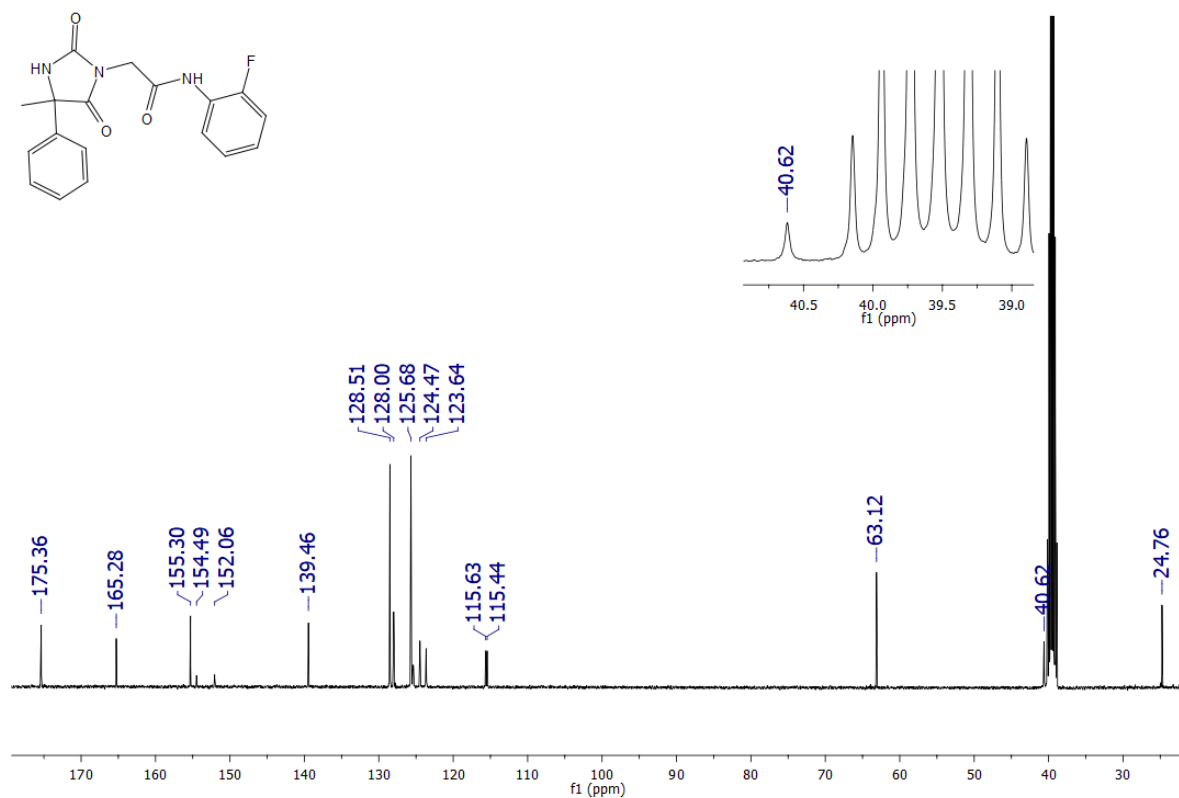

**Figure S20.** <sup>13</sup>C-NMR spectrum of compound **5f** in DMSO-*d*<sub>6</sub> at 100MHz.

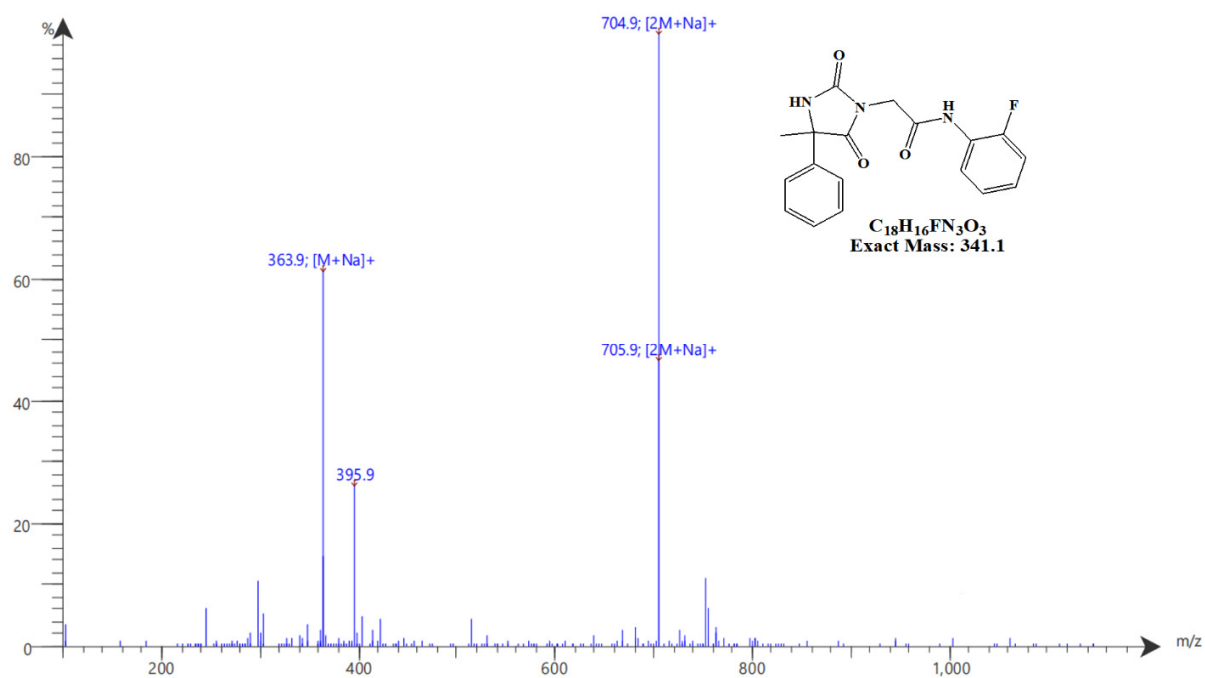

**Figure S21.** ESI mass spectrum of compound **5f**.

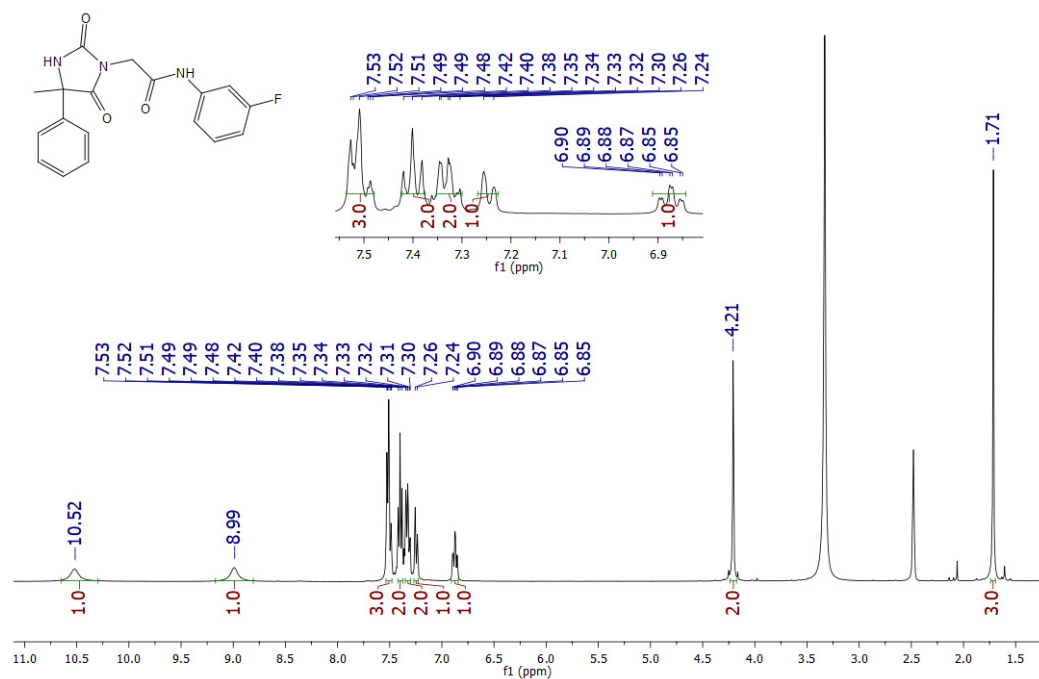

**Figure S22.** <sup>1</sup>H-NMR spectrum of compound **5g** in DMSO-*d*<sub>6</sub> at 400MHz.

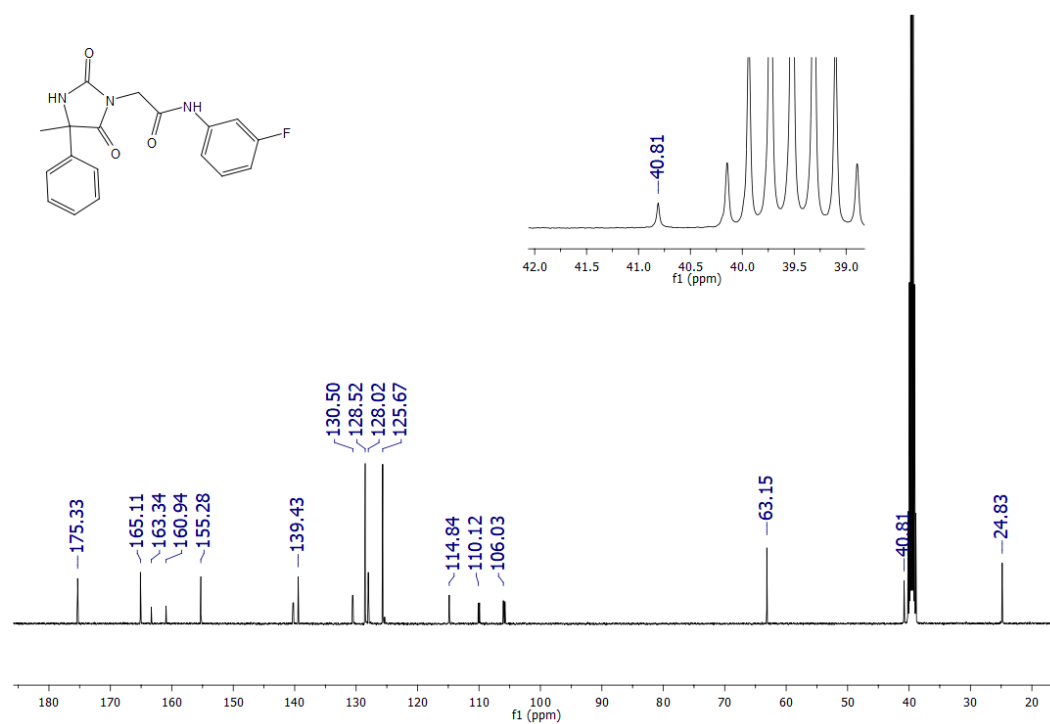

**Figure S23.** <sup>13</sup>C-NMR spectrum of compound **5g** in DMSO-*d*<sub>6</sub> at 100MHz.



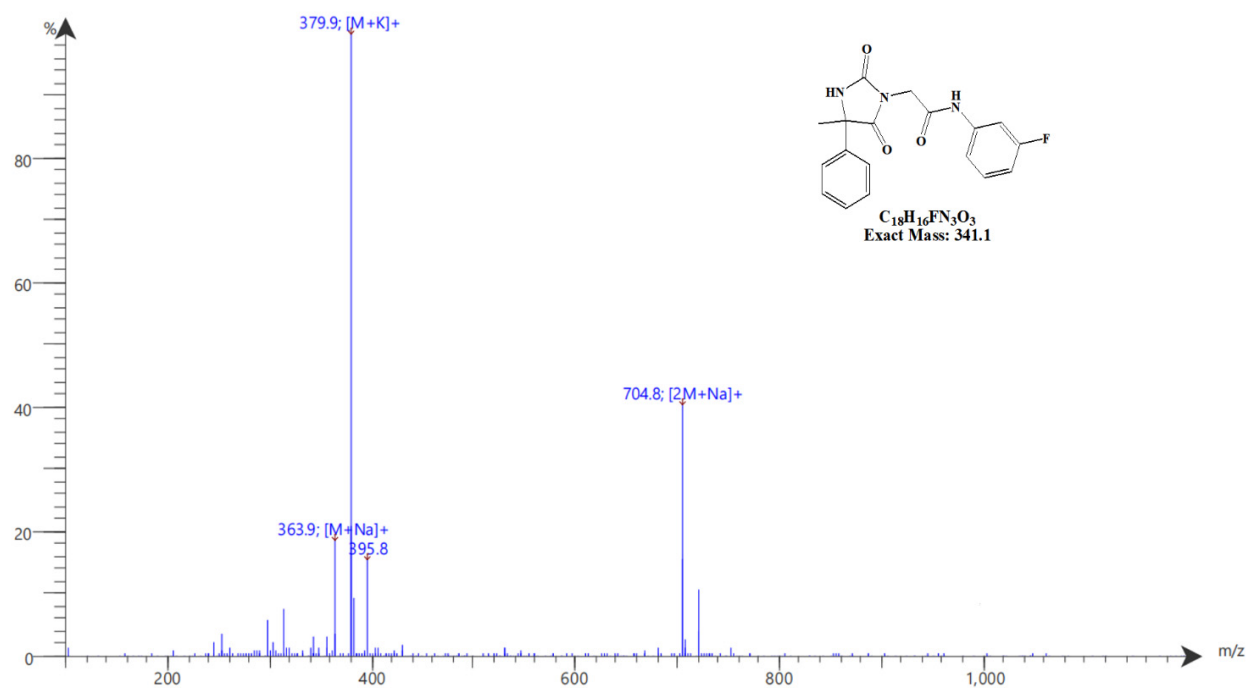

**Figure S24.** ESI mass spectrum of compound **5g**.

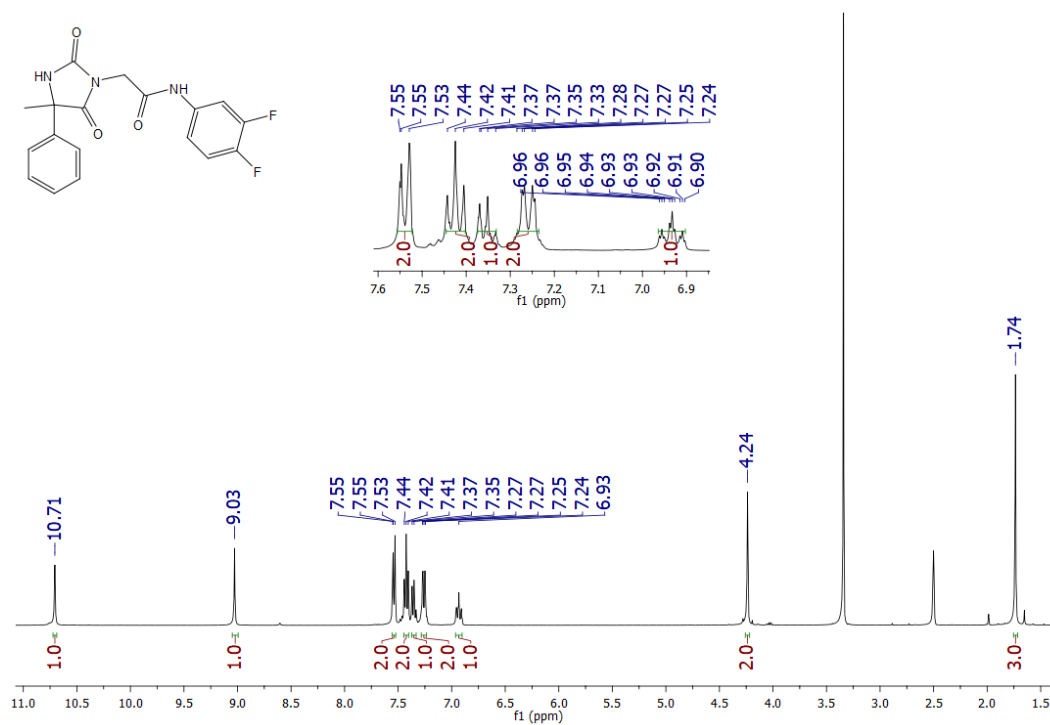

**Figure S25.**  $^1H$ -NMR spectrum of compound **5h** in  $DMSO-d_6$  at 400MHz.

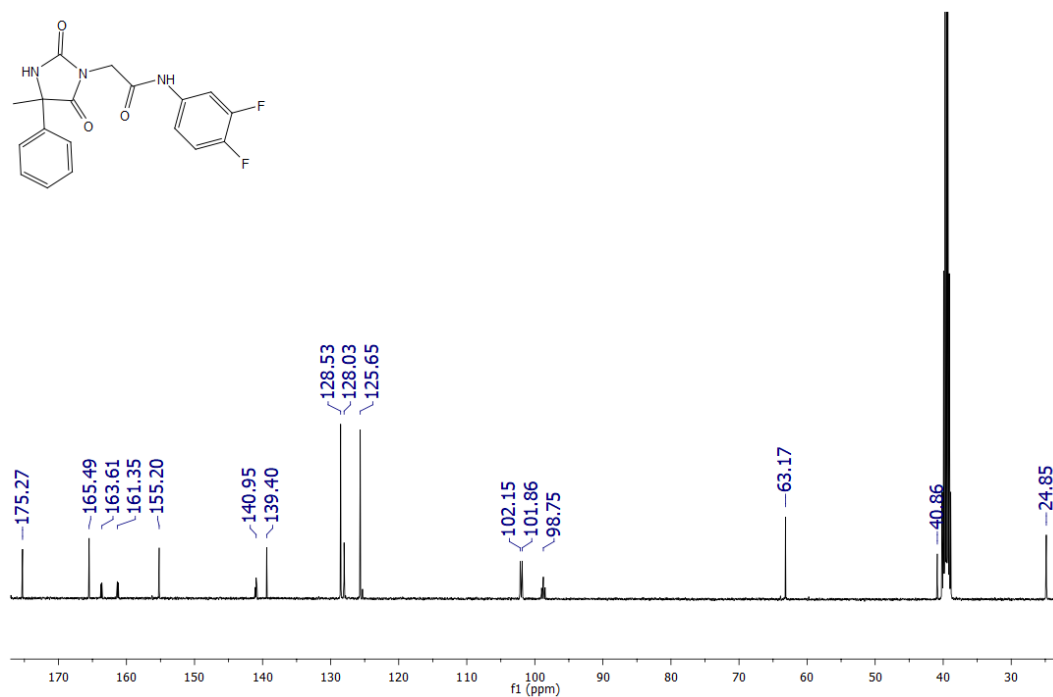

**Figure S26.** <sup>13</sup>C-NMR spectrum of compound **5h** in DMSO-*d*<sub>6</sub> at 100MHz.

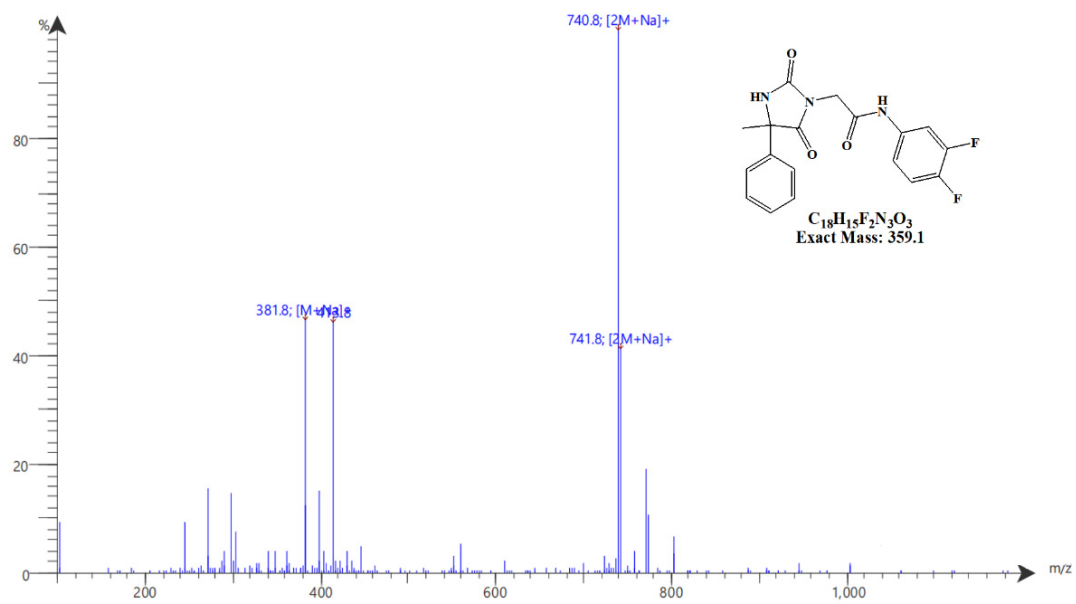

**Figure S27.** ESI mass spectrum of compound **5h**.

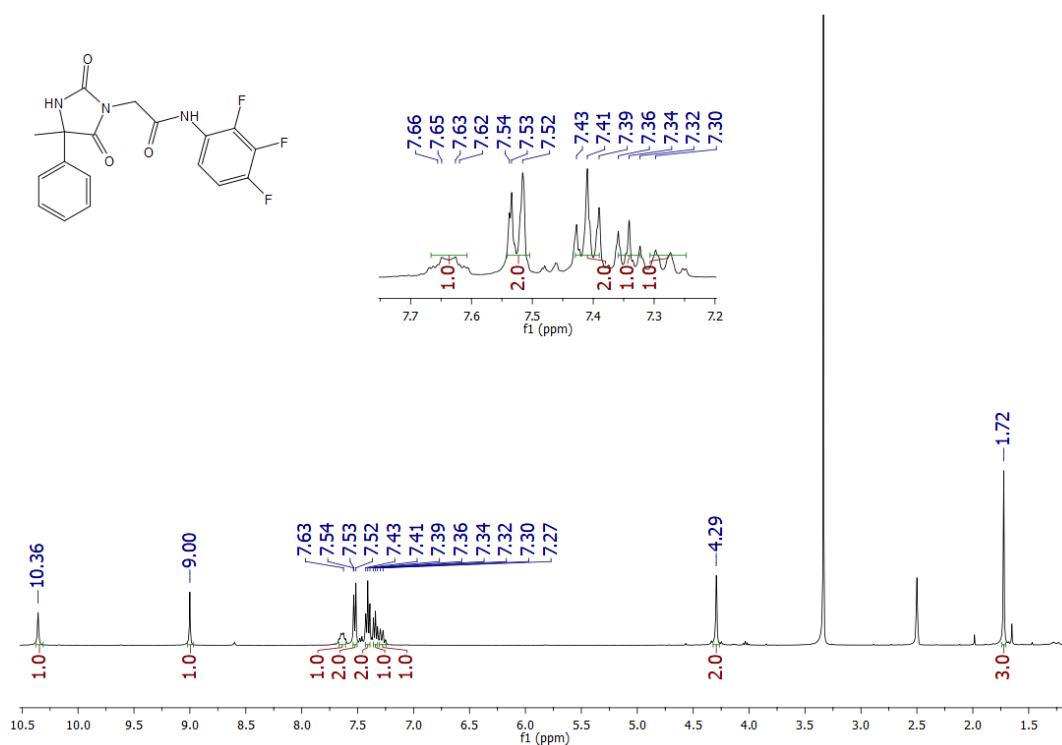

**Figure S28.** <sup>1</sup>H-NMR spectrum of compound **5i** in DMSO-*d*<sub>6</sub> at 400MHz.

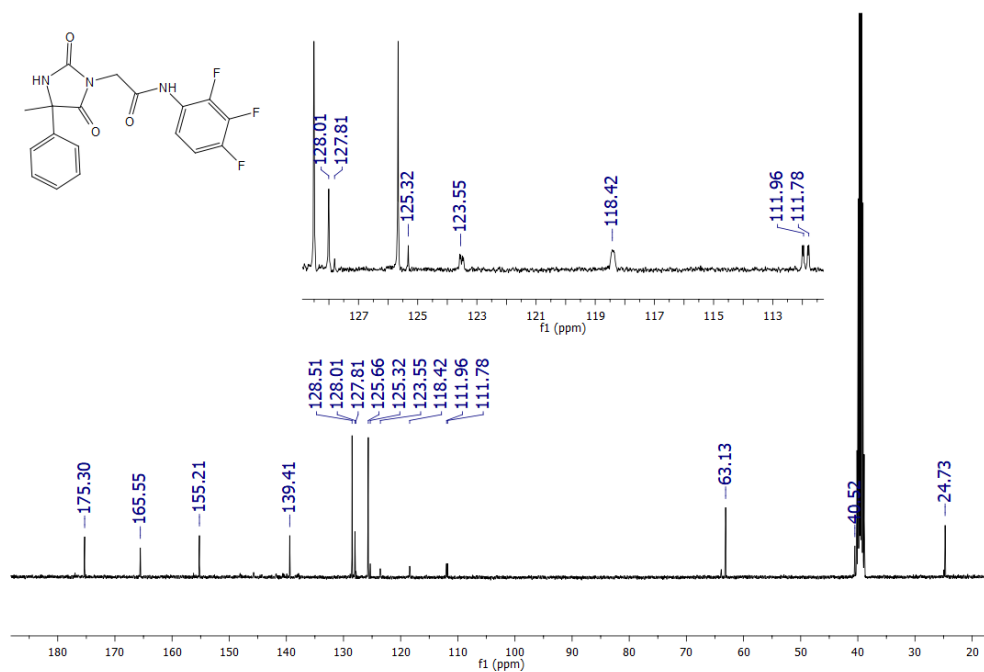

**Figure S29.** <sup>13</sup>C-NMR spectrum of compound **5i** in DMSO-*d*<sub>6</sub> at 100MHz.

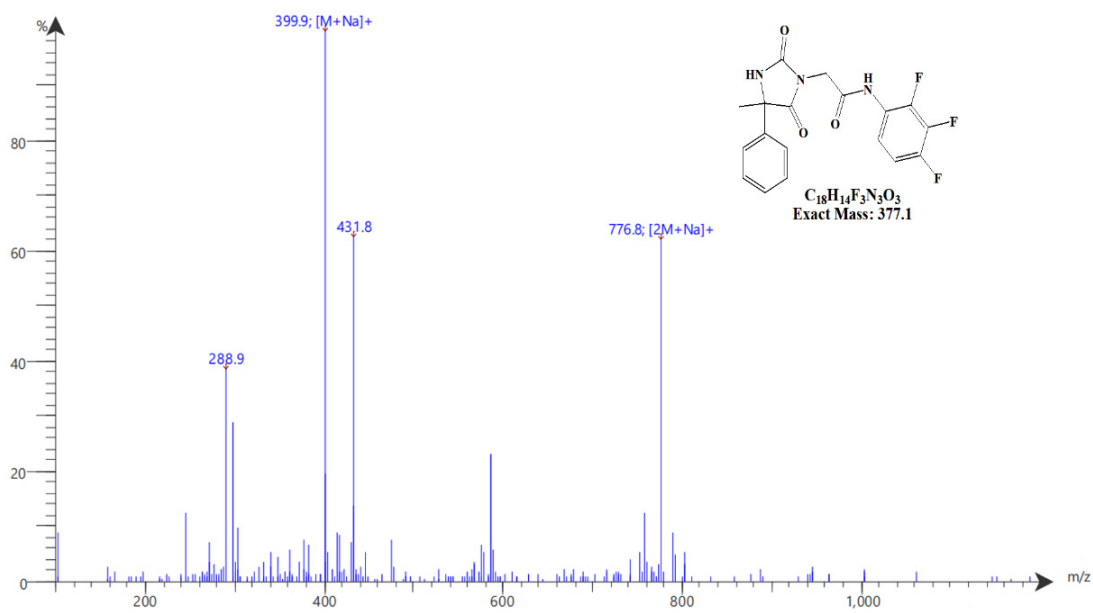

**Figure S30.** ESI mass spectrum of compound **5i**.

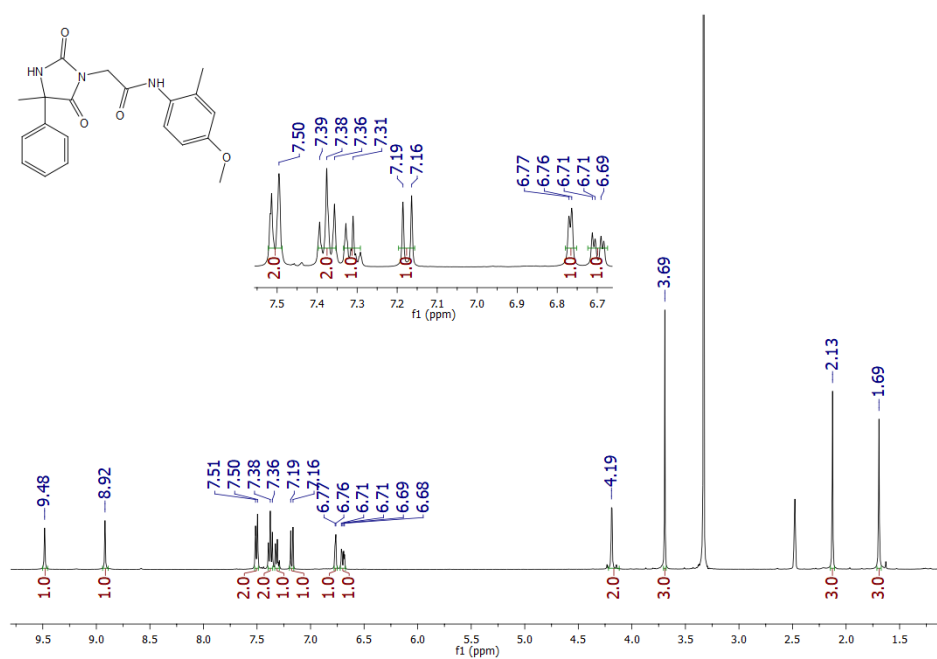

**Figure S31.**  $^1H$ -NMR spectrum of compound **5j** in  $DMSO-d_6$  at 400 MHz.

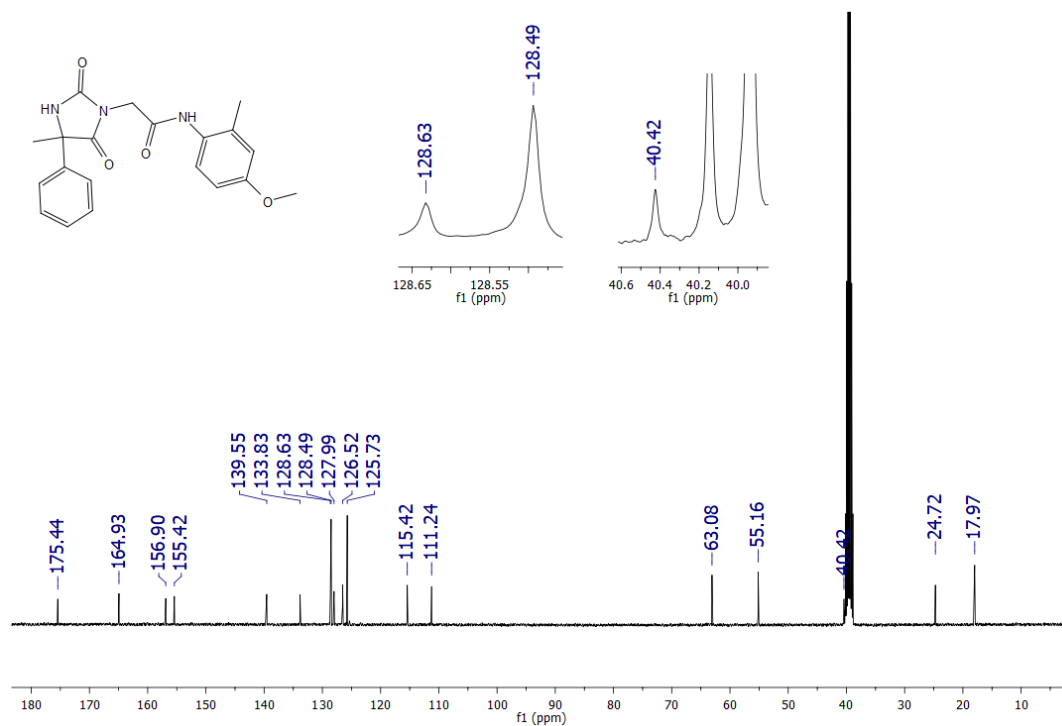

**Figure S32.**  $^{13}\text{C}$ -NMR spectrum of compound **5j** in  $\text{DMSO-}d_6$  at 100MHz.

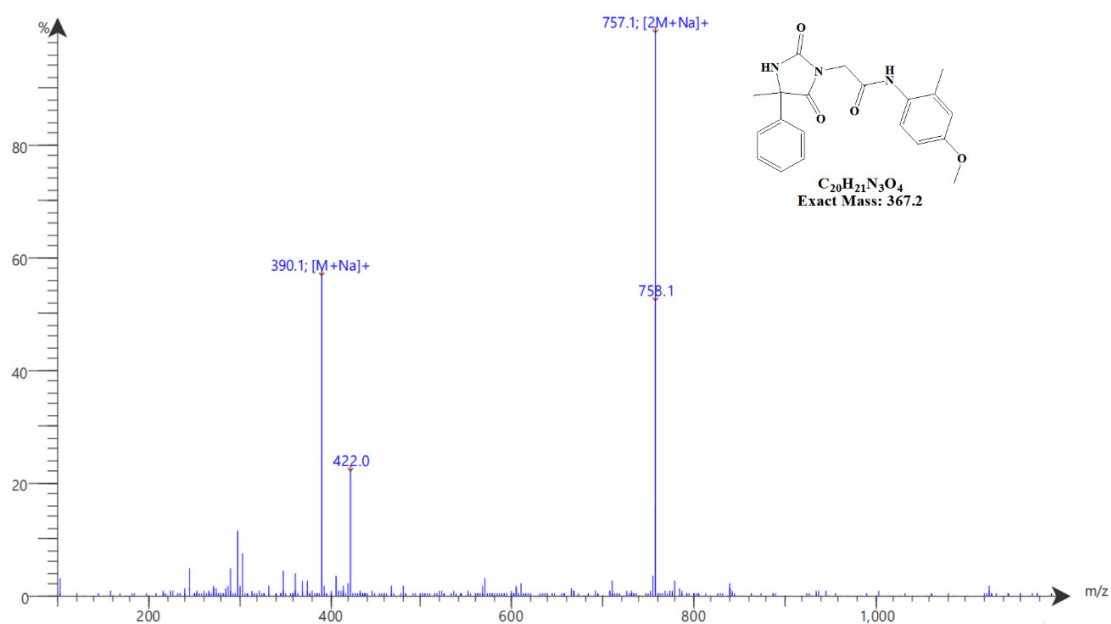

**Figure S33.** ESI mass spectrum of compound **5j**.

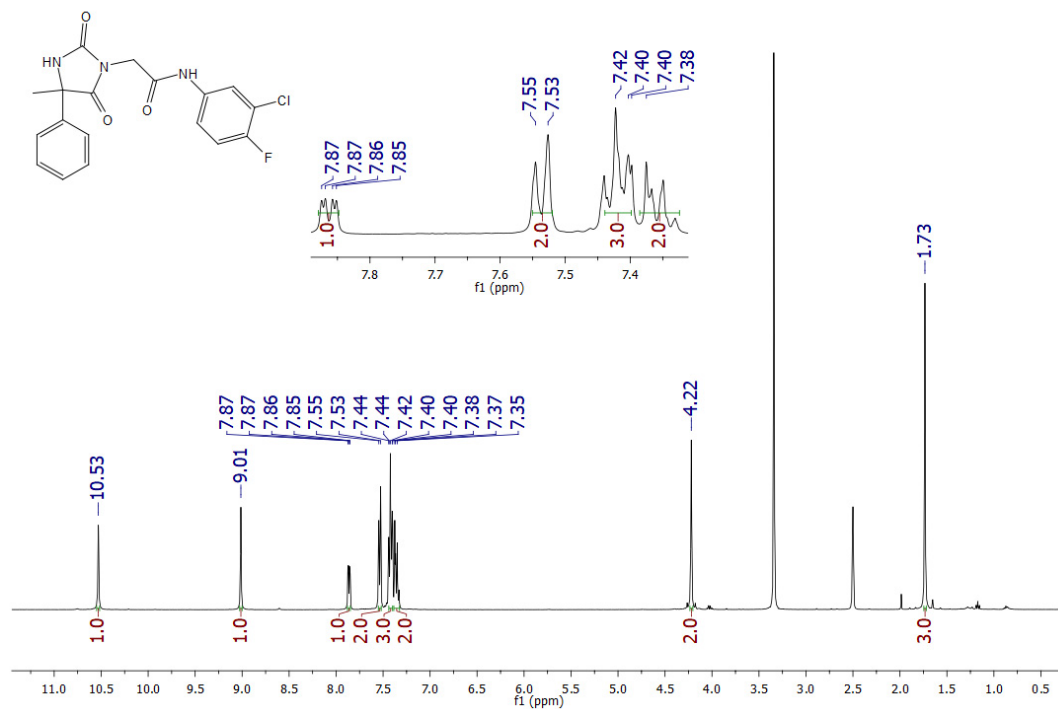

**Figure S34.** <sup>1</sup>H-NMR spectrum of compound **5k** in DMSO-*d*<sub>6</sub> at 400MHz.

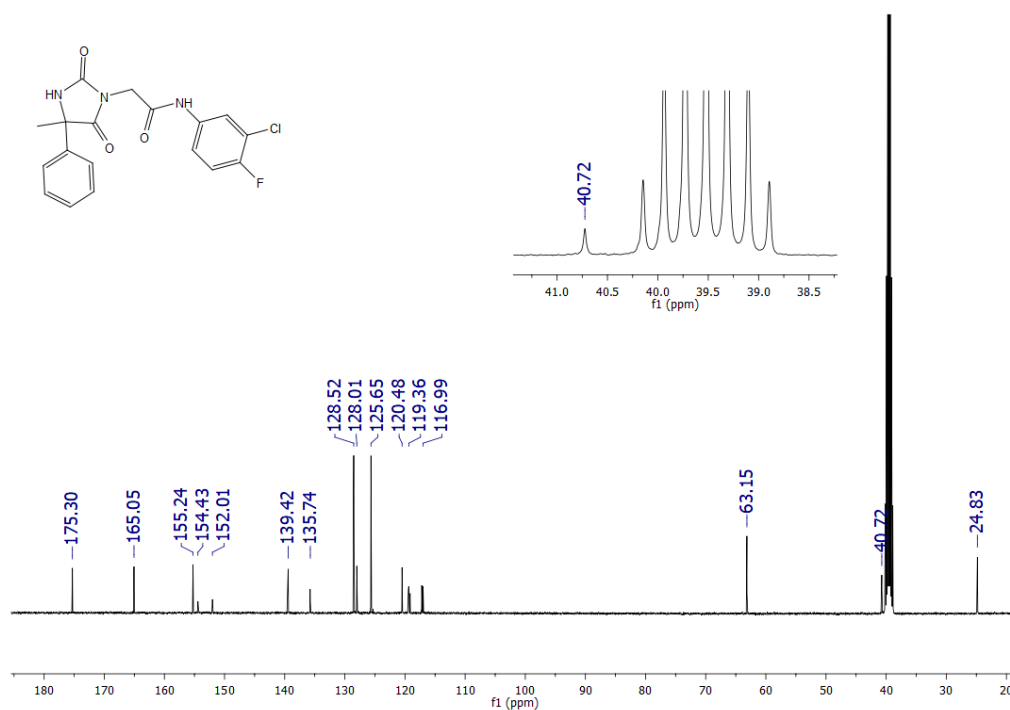

**Figure S35.** <sup>13</sup>C-NMR spectrum of compound **5k** in DMSO-*d*<sub>6</sub> at 100MHz.

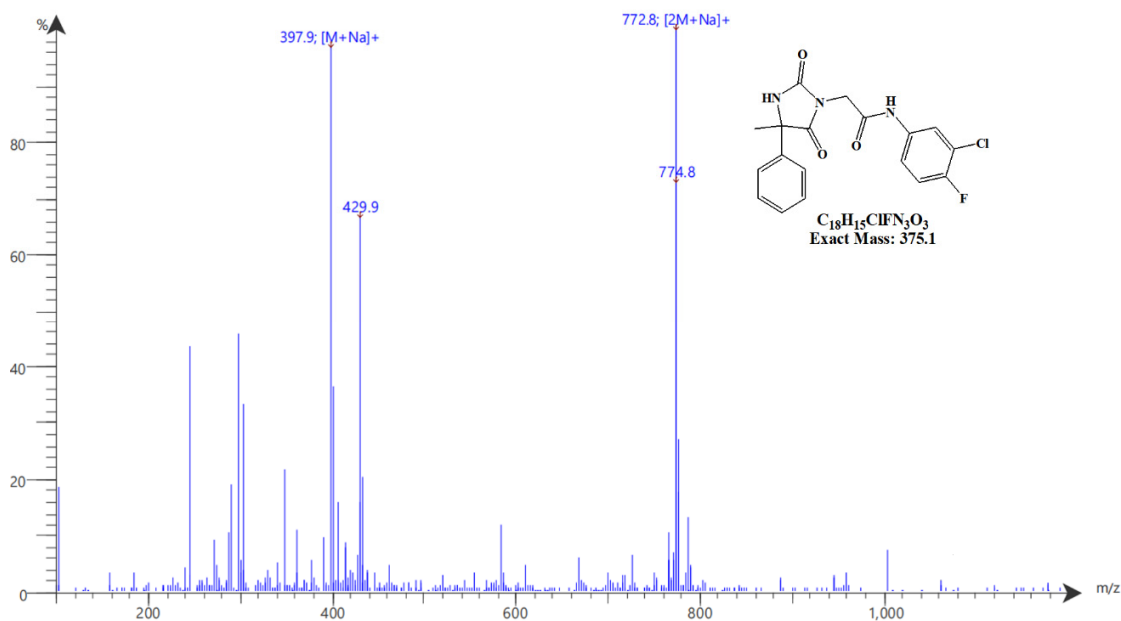

**Figure S36.** ESI mass spectrum of compound **5k**.

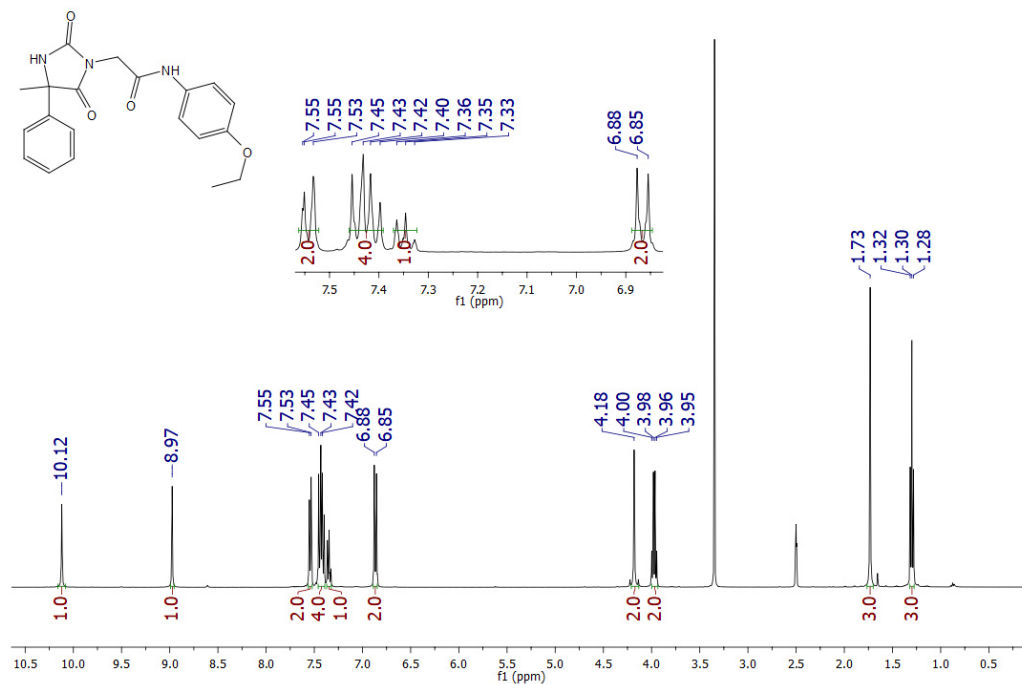

**Figure S37.**  $^1H$ -NMR spectrum of compound **5l** in  $DMSO-d_6$  at 400 MHz.

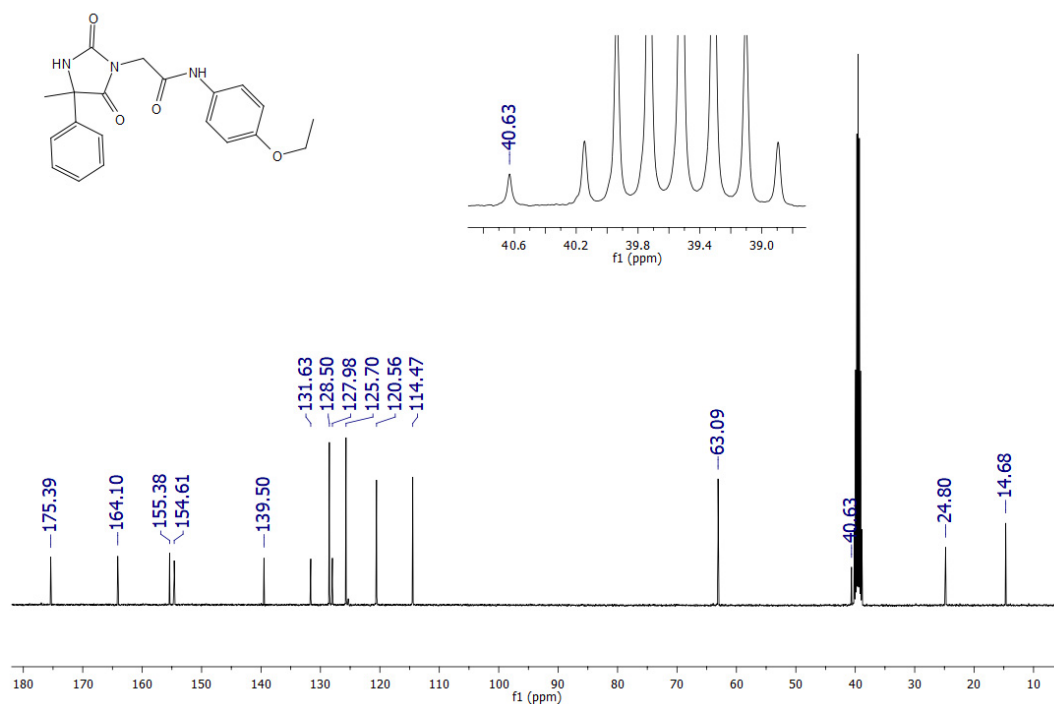

**Figure S38.** <sup>13</sup>C-NMR spectrum of compound **5I** in DMSO-*d*<sub>6</sub> at 100MHz.

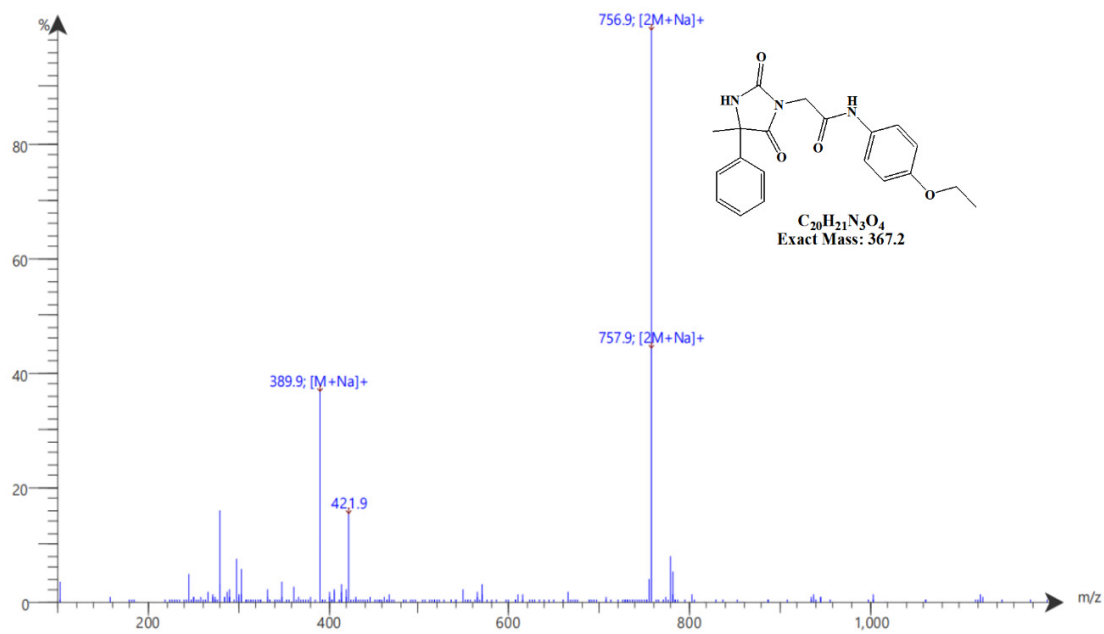

**Figure S39.** ESI mass spectrum of compound **5I**.



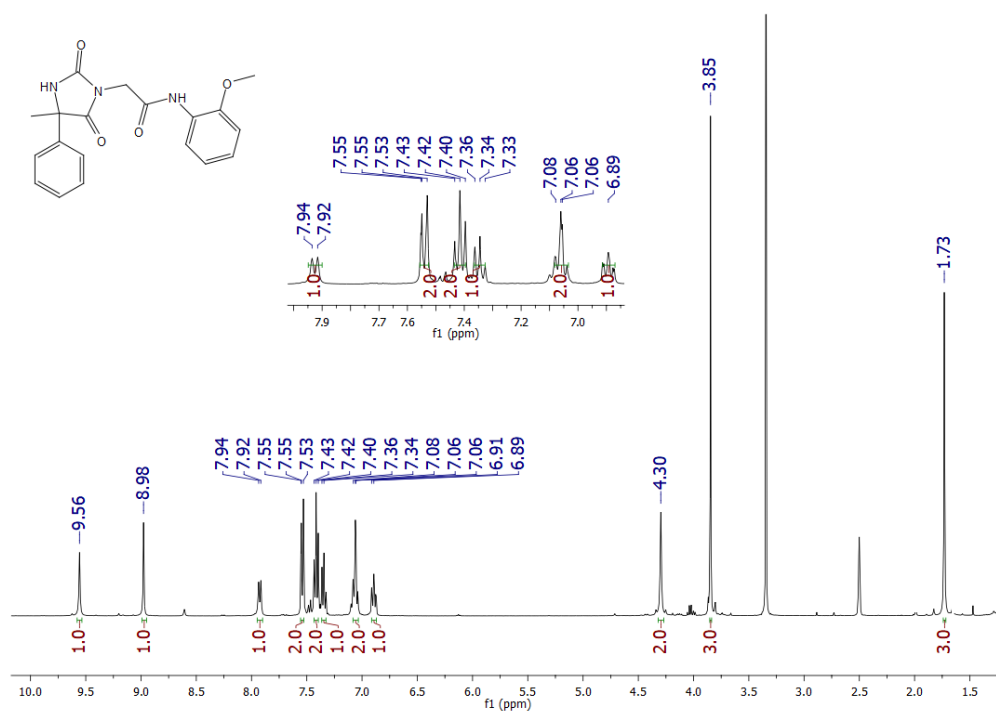

**Figure S40.** <sup>1</sup>H-NMR spectrum of compound **5m** in DMSO-*d*<sub>6</sub> at 400MHz.

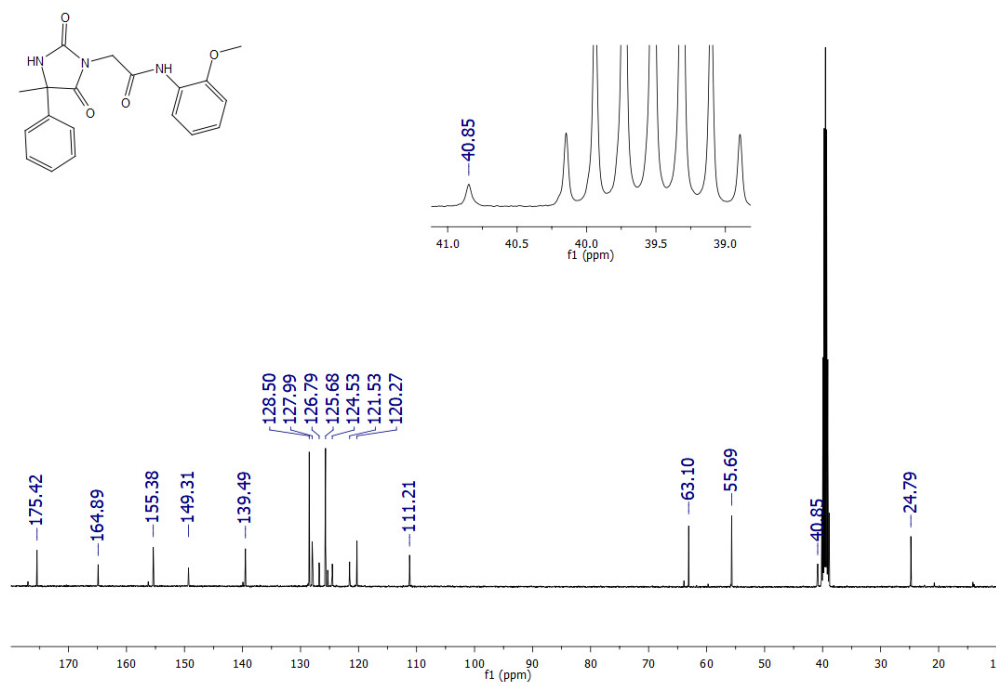

**Figure S41.** <sup>13</sup>C-NMR spectrum of compound **5m** in DMSO-*d*<sub>6</sub> at 100MHz.

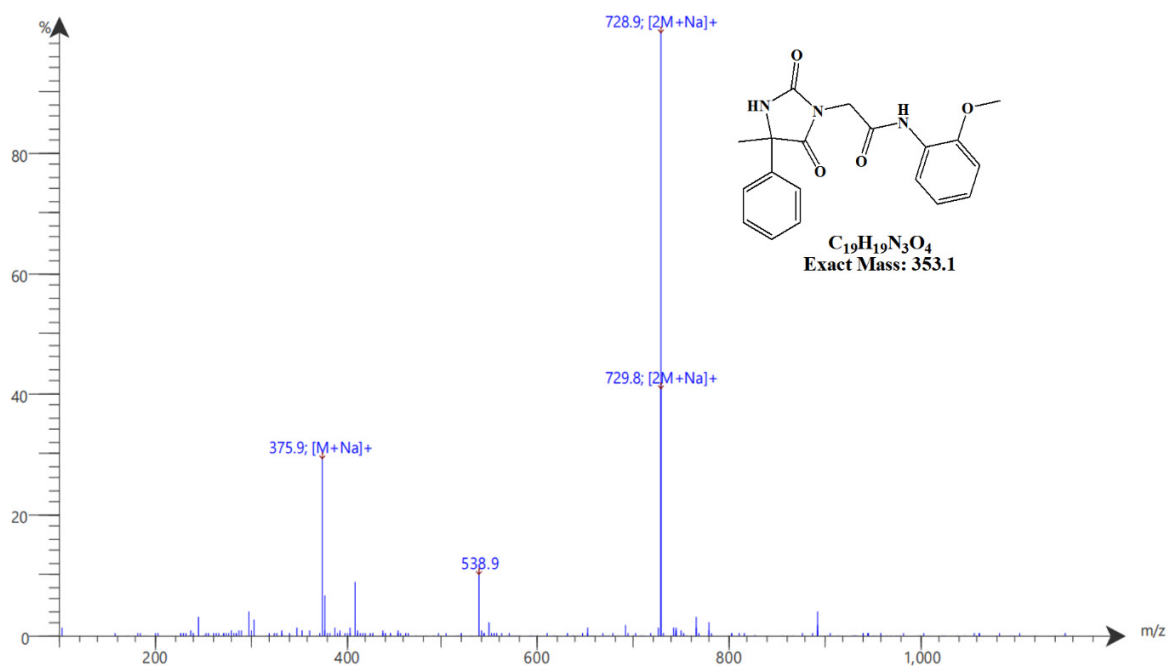

**Figure S42.** ESI mass spectrum of compound **5m**.

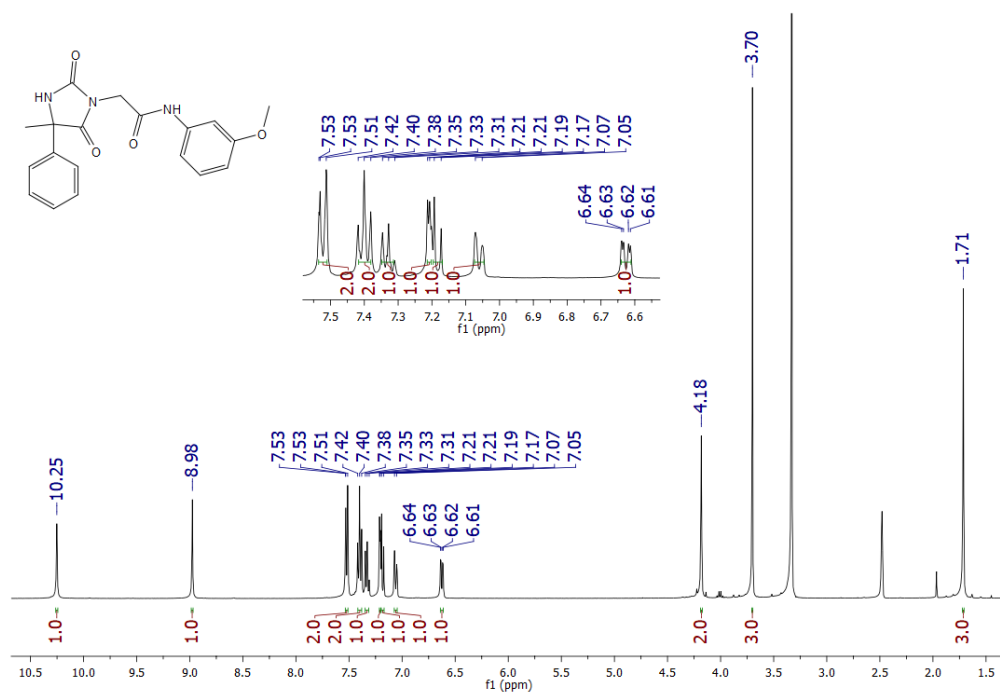

**Figure S43.**  $^1H$ -NMR spectrum of compound **5n** in  $DMSO-d_6$  at 400MHz.

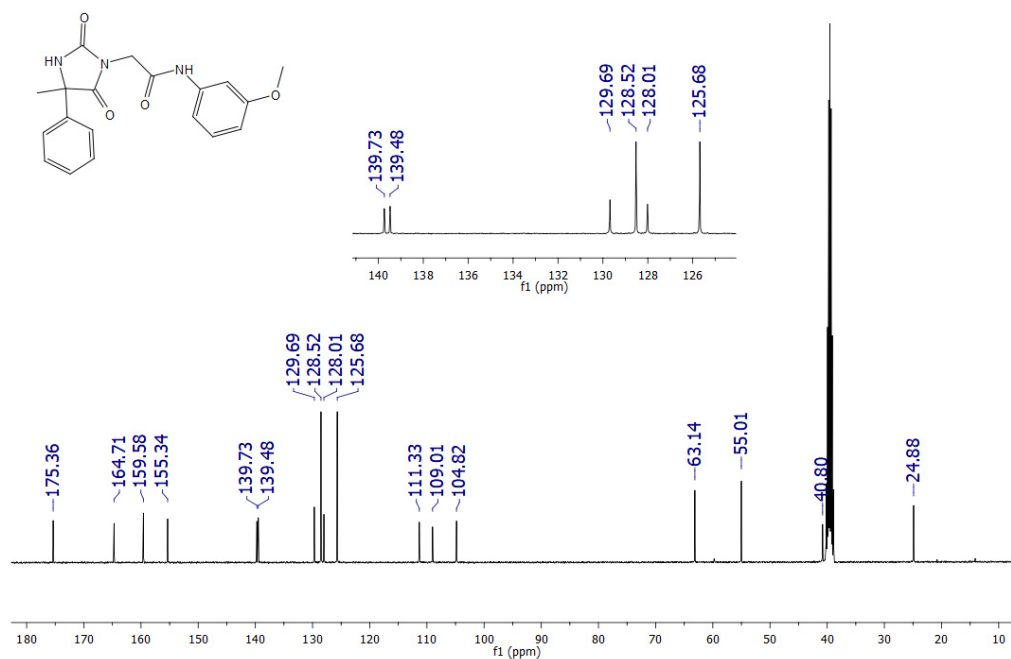

**Figure S44.** <sup>13</sup>C-NMR spectrum of compound **5n** in DMSO-*d*<sub>6</sub> at 100MHz.

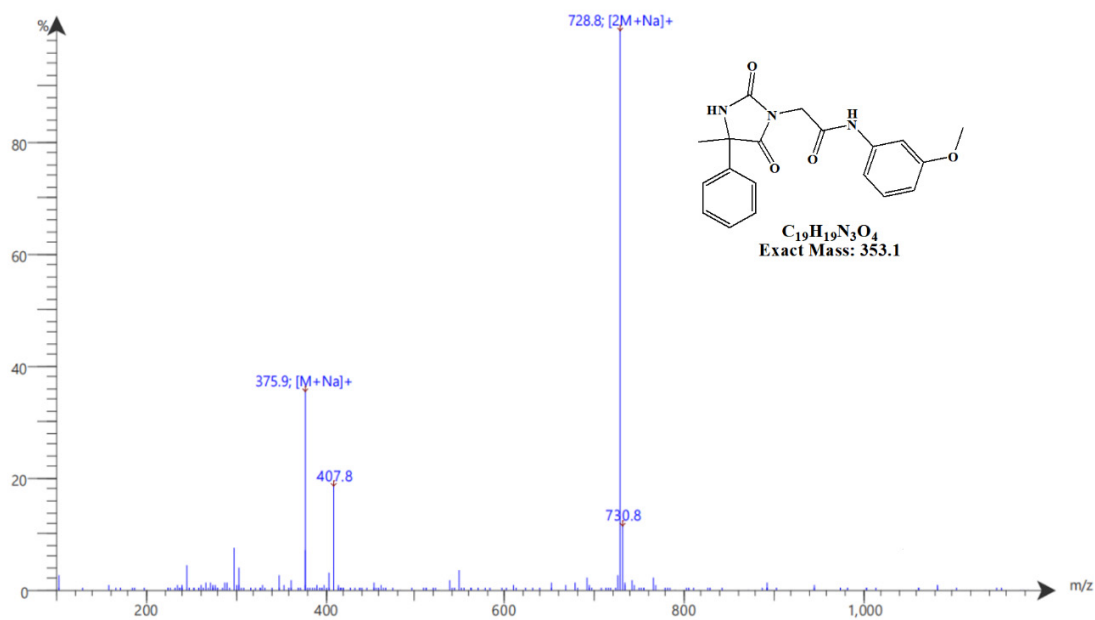

**Figure S45.** ESI mass spectrum of compound **5n**.

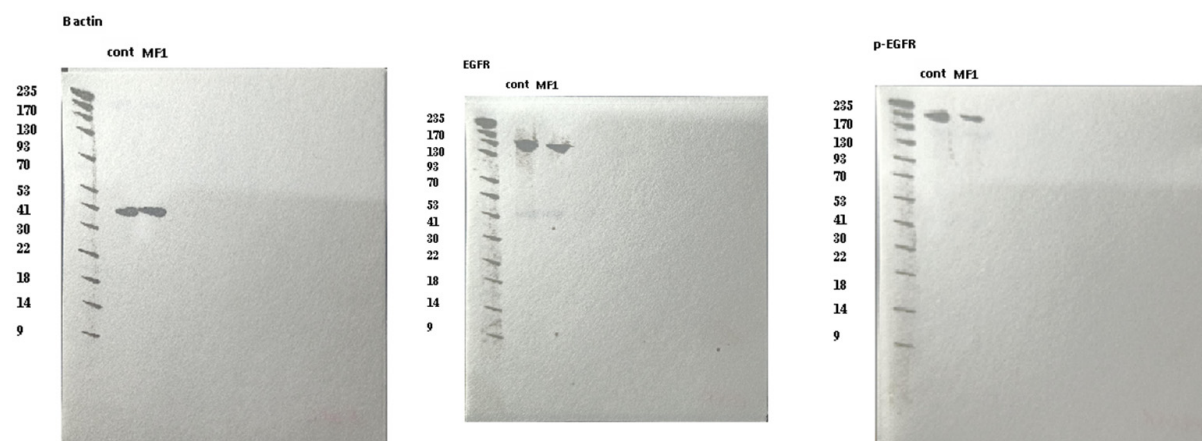

**Figure S46.** Western blotting analysis measuring the expression of **5a** on EGFR.
